# Supplementary material for: Variation of soil bacterial communities along a chronosequence of Eucalyptus plantation
Source: PeerJ. 2018 Sep 24;6:e5648. doi: 10.7717/peerj.5648 (PMC6160830; doi:10.7717/peerj.5648)
Supplement: Table S2 [file peerj-06-5648-s009.xlsx]

## Sheet: Table S2
#OTU ID	impacted: mean rel. freq. (%)	impacted: std. dev. (%)	low impacted: mean rel. freq. (%)	low impacted: std. dev. (%)	p-values	p-values (corrected)	Difference between means	95.0% lower CI	95.0% upper CI	Note	sample10y1	sample10y1: parent seq. count	sample10y1: rel. freq. (%)	sample10y2	sample10y2: parent seq. count	sample10y2: rel. freq. (%)	sample10y3	sample10y3: parent seq. count	sample10y3: rel. freq. (%)	sample2y1	sample2y1: parent seq. count	sample2y1: rel. freq. (%)	sample2y2	sample2y2: parent seq. count	sample2y2: rel. freq. (%)	sample2y3	sample2y3: parent seq. count	sample2y3: rel. freq. (%)	sample5y1	sample5y1: parent seq. count	sample5y1: rel. freq. (%)	sample5y2	sample5y2: parent seq. count	sample5y2: rel. freq. (%)	sample5y3	sample5y3: parent seq. count	sample5y3: rel. freq. (%)	sampleCK1	sampleCK1: parent seq. count	sampleCK1: rel. freq. (%)	sampleCK2	sampleCK2: parent seq. count	sampleCK2: rel. freq. (%)	sampleCK3	sampleCK3: parent seq. count	sampleCK3: rel. freq. (%)
1,1,1-Trichloro-2,2-bis(4-chlorophenyl)ethane (DDT) degradation	0.00369567	0.000795391	0.00508768	0.000752257	0.0175041	0.0175041	-0.00139201	-0.00248337	-0.000300659		153	4784502	0.00319782	149	5961362	0.00249943	205	5830473	0.00351601	211	5829240	0.00361968	245	5603916	0.00437194	249	5010959	0.00496911	277	5749760	0.00481759	259	5762448	0.00449462	299	5837442	0.00512211	297	4873296	0.00609444	435	7269910	0.00598357	186	4634062	0.00401376
Alanine, aspartate and glutamate metabolism	0.862269	0.0211436	0.825222	0.0432737	0.127586	0.127586	0.0370477	-0.0135187	0.087614		42351	4784502	0.88517	53031	5961362	0.889579	49758	5830473	0.853413	50402	5829240	0.864641	47860	5603916	0.854046	41429	5010959	0.826768	48656	5749760	0.846227	49556	5762448	0.859982	46202	5837442	0.791477	37055	4873296	0.760368	58586	7269910	0.80587	41123	4634062	0.887407
Biosynthesis of 12-, 14- and 16-membered macrolides	0.000405247	0.000220913	0.000258503	0.000217117	0.314363	0.314363	0.000146744	-0.000161916	0.000455404		30	4784502	0.000627025	15	5961362	0.00025162	41	5830473	0.000703202	12	5829240	0.000205859	7	5603916	0.000124913	26	5010959	0.000518863	0	5749760	0	7	5762448	0.000121476	11	5837442	0.000188439	31	4873296	0.00063612	33	7269910	0.000453926	7	4634062	0.000151055
Glycine, serine and threonine metabolism	0.975638	0.00790744	0.965612	0.0104678	0.120517	0.120517	0.0100266	-0.00317931	0.0232325		46668	4784502	0.975399	58579	5961362	0.982645	56138	5830473	0.962838	57468	5829240	0.985858	54834	5603916	0.978494	48536	5010959	0.968597	55554	5749760	0.966197	55777	5762448	0.967939	55935	5837442	0.958211	46537	4873296	0.954939	69764	7269910	0.959627	45727	4634062	0.986758
Phenylalanine, tyrosine and tryptophan biosynthesis	0.577611	0.0119369	0.551136	0.0381154	0.189032	0.189032	0.0264752	-0.0172824	0.0702329		28325	4784502	0.592016	35357	5961362	0.593103	33307	5830473	0.571257	33810	5829240	0.580007	31840	5603916	0.568174	28117	5010959	0.56111	32365	5749760	0.562893	33572	5762448	0.5826	29956	5837442	0.51317	24062	4873296	0.493752	39974	7269910	0.549856	28015	4634062	0.604545
Replication, recombination and repair proteins	0.658218	0.0129337	0.648451	0.012436	0.251525	0.251525	0.00976676	-0.0081159	0.0276494		30751	4784502	0.642721	40365	5961362	0.67711	38312	5830473	0.657099	38802	5829240	0.665644	37304	5603916	0.665677	32123	5010959	0.641055	37722	5749760	0.656062	37496	5762448	0.650696	39164	5837442	0.67091	31088	4873296	0.637926	46169	7269910	0.63507	29660	4634062	0.640043
Stilbenoid, diarylheptanoid and gingerol biosynthesis	0.0841262	0.00688113	0.0932862	0.0126218	0.193308	0.193308	-0.00916005	-0.0240757	0.00575557		4147	4784502	0.0866757	4388	5961362	0.0736073	4823	5830473	0.0827206	4560	5829240	0.0782263	5288	5603916	0.0943626	4468	5010959	0.0891646	5278	5749760	0.0917951	4904	5762448	0.0851027	6255	5837442	0.107153	5085	4873296	0.104344	7325	7269910	0.100758	3270	4634062	0.0705644
Tropane, piperidine and pyridine alkaloid biosynthesis	0.127285	0.00366852	0.131624	0.00278943	0.0634691	0.0634691	-0.00433919	-0.00897629	0.000297904		6236	4784502	0.130337	7242	5961362	0.121482	7289	5830473	0.125016	7283	5829240	0.124939	7340	5603916	0.13098	6562	5010959	0.130953	7508	5749760	0.130579	7496	5762448	0.130084	7605	5837442	0.13028	6565	4873296	0.134714	9888	7269910	0.136013	5935	4634062	0.128073
Valine, leucine and isoleucine biosynthesis	0.662232	0.00445126	0.641501	0.00311492	1.36584e-05	1.36584e-05	0.0207307	0.0152297	0.0262317		31584	4784502	0.660131	39651	5961362	0.665133	38480	5830473	0.659981	38749	5829240	0.664735	37466	5603916	0.668568	32814	5010959	0.654845	36922	5749760	0.642149	36880	5762448	0.640006	37208	5837442	0.637402	31160	4873296	0.639403	46734	7269910	0.642842	29992	4634062	0.647208
Valine, leucine and isoleucine degradation	1.11535	0.0340578	1.10191	0.0910954	0.767169	0.767169	0.01344	-0.0914998	0.11838		54171	4784502	1.13222	63200	5961362	1.06016	65472	5830473	1.12293	63821	5829240	1.09484	65638	5603916	1.17129	55654	5010959	1.11065	62348	5749760	1.08436	59554	5762448	1.03348	69377	5837442	1.18848	60487	4873296	1.24119	79655	7269910	1.09568	44869	4634062	0.968243
ABC transporters	3.79242	0.155872	4.10211	0.469922	0.210741	0.210741	-0.309688	-0.849598	0.230221		168848	4784502	3.52906	219326	5961362	3.67913	229955	5830473	3.94402	222484	5829240	3.81669	212567	5603916	3.79319	200060	5010959	3.99245	224010	5749760	3.89599	213164	5762448	3.69919	267095	5837442	4.57555	236121	4873296	4.8452	296654	7269910	4.08057	162941	4634062	3.51616
Adherens junction	0	0	0	0	1	1	0	0	0	degenerate case: variance of both groups is zero	0	4784502	0	0	5961362	0	0	5830473	0	0	5829240	0	0	5603916	0	0	5010959	0	0	5749760	0	0	5762448	0	0	5837442	0	0	4873296	0	0	7269910	0	0	4634062	0
Adipocytokine signaling pathway	0.115539	0.00127705	0.111279	0.00308793	0.0260227	0.0260227	0.00425946	0.000689061	0.00782985		5432	4784502	0.113533	6935	5961362	0.116332	6856	5830473	0.117589	6702	5829240	0.114972	6497	5603916	0.115937	5756	5010959	0.114868	6483	5749760	0.112753	6523	5762448	0.113198	6475	5837442	0.110922	5099	4873296	0.104631	8258	7269910	0.113592	5217	4634062	0.112579
African trypanosomiasis	0.0259125	0.00109236	0.0265246	0.0033966	0.714428	0.714428	-0.000612132	-0.00451283	0.00328856		1335	4784502	0.0279026	1592	5961362	0.0267053	1435	5830473	0.0246121	1489	5829240	0.0255436	1407	5603916	0.0251074	1283	5010959	0.0256039	1588	5749760	0.0276185	1674	5762448	0.0290502	1362	5837442	0.0233321	1021	4873296	0.0209509	1978	7269910	0.027208	1436	4634062	0.0309879
Aldosterone-regulated sodium reabsorption	0	0	0	0	1	1	0	0	0	degenerate case: variance of both groups is zero	0	4784502	0	0	5961362	0	0	5830473	0	0	5829240	0	0	5603916	0	0	5010959	0	0	5749760	0	0	5762448	0	0	5837442	0	0	4873296	0	0	7269910	0	0	4634062	0
alpha-Linolenic acid metabolism	0.026332	0.00209712	0.0202577	0.00175402	0.000617618	0.000617618	0.0060743	0.00333845	0.00881014		1431	4784502	0.0299091	1628	5961362	0.0273092	1481	5830473	0.025401	1466	5829240	0.0251491	1515	5603916	0.0270347	1162	5010959	0.0231892	1228	5749760	0.0213574	1274	5762448	0.0221087	1141	5837442	0.0195462	867	4873296	0.0177908	1343	7269910	0.0184734	1032	4634062	0.0222699
Alzheimer's disease	0.114553	0.00159915	0.121821	0.00822734	0.106173	0.106173	-0.00726762	-0.016703	0.00216772		5386	4784502	0.112572	6738	5961362	0.113028	6658	5830473	0.114193	6833	5829240	0.117219	6411	5603916	0.114402	5808	5010959	0.115906	6784	5749760	0.117988	6577	5762448	0.114136	7441	5837442	0.12747	6680	4873296	0.137074	8766	7269910	0.120579	5268	4634062	0.11368
Amino acid metabolism	0.247909	0.00336481	0.2568	0.00309298	0.00146773	0.00146773	-0.00889104	-0.0134496	-0.0043325		11584	4784502	0.242115	14932	5961362	0.25048	14274	5830473	0.244817	14480	5829240	0.248403	14016	5603916	0.250111	12604	5010959	0.251529	14812	5749760	0.257611	14820	5762448	0.257182	15162	5837442	0.259737	12392	4873296	0.254284	18284	7269910	0.251502	12071	4634062	0.260484
Amino acid related enzymes	1.09374	0.0175586	1.05581	0.0381526	0.0830227	0.0830227	0.0379333	-0.00644573	0.0823123		53423	4784502	1.11658	66360	5961362	1.11317	63073	5830473	1.08178	64102	5829240	1.09966	60705	5603916	1.08326	53517	5010959	1.068	61329	5749760	1.06664	62615	5762448	1.0866	59078	5837442	1.01205	49126	4873296	1.00807	76142	7269910	1.04736	51630	4634062	1.11414
Amino sugar and nucleotide sugar metabolism	1.05576	0.0288569	0.990834	0.126558	0.309695	0.309695	0.0649254	-0.0801792	0.21003		51994	4784502	1.08672	65512	5961362	1.09894	60006	5830473	1.02918	61866	5829240	1.0613	57876	5603916	1.03278	51394	5010959	1.02563	59580	5749760	1.03622	63165	5762448	1.09615	51121	5837442	0.875743	38487	4873296	0.789753	71631	7269910	0.985308	53840	4634062	1.16183
Aminoacyl-tRNA biosynthesis	0.872685	0.0130487	0.8481	0.0342884	0.181513	0.181513	0.0245841	-0.0149366	0.0641048		42550	4784502	0.88933	52757	5961362	0.884982	50673	5830473	0.869106	51210	5829240	0.878502	48339	5603916	0.862593	42673	5010959	0.851593	49189	5749760	0.855497	50511	5762448	0.876555	47110	5837442	0.807032	39269	4873296	0.8058	61337	7269910	0.843711	41707	4634062	0.90001
Aminobenzoate degradation	0.732669	0.0349309	0.792439	0.0713968	0.134999	0.134999	-0.0597694	-0.143208	0.0236689		34320	4784502	0.717316	40195	5961362	0.674259	43037	5830473	0.738139	41889	5829240	0.718601	43657	5603916	0.779045	38517	5010959	0.768655	44698	5749760	0.777389	42620	5762448	0.739616	50375	5837442	0.862964	43030	4873296	0.882975	59377	7269910	0.81675	31277	4634062	0.674937
Amoebiasis	0.0194894	0.00139353	0.0189609	0.00233312	0.674928	0.674928	0.000528509	-0.00226428	0.0033213		888	4784502	0.0185599	1312	5961362	0.0220084	1126	5830473	0.0193123	1172	5829240	0.0201055	1091	5603916	0.0194685	876	5010959	0.0174817	1190	5749760	0.0206965	1201	5762448	0.0208418	1035	5837442	0.0177304	786	4873296	0.0161287	1186	7269910	0.0163138	1022	4634062	0.0220541
Amyotrophic lateral sclerosis (ALS)	0.0608679	0.00240912	0.069057	0.00669404	0.0404743	0.0404743	-0.0081891	-0.0158926	-0.00048555		2806	4784502	0.0586477	3467	5961362	0.0581579	3550	5830473	0.060887	3493	5829240	0.059922	3491	5603916	0.0622957	3272	5010959	0.0652969	3877	5749760	0.0674289	3645	5762448	0.0632544	4459	5837442	0.0763862	3707	4873296	0.0760676	5298	7269910	0.0728757	2703	4634062	0.058329
Antigen processing and presentation	0.00975413	0.00104398	0.0125201	0.00120915	0.00322518	0.00322518	-0.00276594	-0.00436236	-0.00116952		383	4784502	0.00800501	580	5961362	0.00972932	595	5830473	0.010205	554	5829240	0.00950381	535	5603916	0.0095469	578	5010959	0.0115347	691	5749760	0.0120179	695	5762448	0.0120608	751	5837442	0.0128652	639	4873296	0.0131123	1055	7269910	0.0145119	489	4634062	0.0105523
Apoptosis	0.0415372	0.00232219	0.0497702	0.00647167	0.0351483	0.0351483	-0.00823306	-0.0156802	-0.000785944		1804	4784502	0.0377051	2355	5961362	0.0395044	2450	5830473	0.0420206	2466	5829240	0.042304	2400	5603916	0.0428272	2248	5010959	0.0448617	2753	5749760	0.0478803	2522	5762448	0.0437661	3299	5837442	0.0565145	2882	4873296	0.0591386	3663	7269910	0.0503858	1897	4634062	0.040936
Arachidonic acid metabolism	0.109591	0.00317143	0.116046	0.00280533	0.00681132	0.00681132	-0.00645515	-0.0106828	-0.0022275		5009	4784502	0.104692	6358	5961362	0.106653	6361	5830473	0.109099	6539	5829240	0.112176	6220	5603916	0.110994	5709	5010959	0.11393	6574	5749760	0.114335	6497	5762448	0.112747	6778	5837442	0.116113	5843	4873296	0.119898	8694	7269910	0.119589	5264	4634062	0.113594
Arginine and proline metabolism	1.2004	0.00494313	1.18545	0.013191	0.0529256	0.0529256	0.0149419	-0.000254897	0.0301387		57130	4784502	1.19406	71799	5961362	1.20441	70319	5830473	1.20606	69874	5829240	1.19868	67515	5603916	1.20478	59850	5010959	1.19438	68106	5749760	1.1845	67460	5762448	1.17068	70024	5837442	1.19957	58786	4873296	1.20629	85618	7269910	1.1777	54403	4634062	1.17398
Arrhythmogenic right ventricular cardiomyopathy (ARVC)	0	0	0	0	1	1	0	0	0	degenerate case: variance of both groups is zero	0	4784502	0	0	5961362	0	0	5830473	0	0	5829240	0	0	5603916	0	0	5010959	0	0	5749760	0	0	5762448	0	0	5837442	0	0	4873296	0	0	7269910	0	0	4634062	0
Ascorbate and aldarate metabolism	0.212657	0.00702578	0.221957	0.00657227	0.056074	0.056074	-0.00930031	-0.0188926	0.000291966		9777	4784502	0.204347	12384	5961362	0.207738	12364	5830473	0.212058	12371	5829240	0.212223	11919	5603916	0.212691	11369	5010959	0.226883	12507	5749760	0.217522	12569	5762448	0.218119	13477	5837442	0.230872	10924	4873296	0.22416	16633	7269910	0.228792	9837	4634062	0.212276
Atrazine degradation	0.0709502	0.00521147	0.0849351	0.0130497	0.0639447	0.0639447	-0.0139849	-0.0290514	0.00108166		2977	4784502	0.0622217	3965	5961362	0.0665116	4321	5830473	0.0741106	4139	5829240	0.0710041	4146	5603916	0.073984	3902	5010959	0.0778693	4665	5749760	0.0811338	4273	5762448	0.0741525	5726	5837442	0.0980909	5090	4873296	0.104447	6195	7269910	0.0852143	3085	4634062	0.0665723
Bacterial chemotaxis	0.640008	0.0172051	0.670611	0.0186795	0.022647	0.022647	-0.030603	-0.0559317	-0.00527432		28957	4784502	0.605225	37696	5961362	0.632339	37896	5830473	0.649964	38253	5829240	0.656226	36180	5603916	0.64562	32605	5010959	0.650674	37628	5749760	0.654427	37827	5762448	0.65644	39765	5837442	0.681206	34364	4873296	0.705149	48972	7269910	0.673626	30252	4634062	0.652818
Bacterial invasion of epithelial cells	3.20514e-05	2.81594e-05	2.23945e-05	2.26879e-05	0.564284	0.564284	9.65688e-06	-2.65992e-05	4.5913e-05		1	4784502	2.09008e-05	4	5961362	6.70988e-05	0	5830473	0	4	5829240	6.86196e-05	2	5603916	3.56893e-05	0	5010959	0	0	5749760	0	3	5762448	5.20612e-05	0	5837442	0	2	4873296	4.104e-05	3	7269910	4.1266e-05	0	4634062	0
Bacterial motility proteins	1.54984	0.02899	1.55835	0.0546294	0.766698	0.766698	-0.00850525	-0.0728592	0.0558487		72689	4784502	1.51926	94424	5961362	1.58393	90828	5830473	1.55782	92656	5829240	1.5895	85399	5603916	1.52392	76398	5010959	1.52462	89367	5749760	1.55427	92048	5762448	1.59738	86990	5837442	1.49021	73245	4873296	1.50299	112970	7269910	1.55394	76522	4634062	1.65129
Bacterial secretion system	0.793561	0.00977093	0.80874	0.00974973	0.0337384	0.0337384	-0.0151789	-0.0289332	-0.00142465		38257	4784502	0.799603	47471	5961362	0.796311	46452	5830473	0.796711	46206	5829240	0.792659	43314	5603916	0.772924	40246	5010959	0.80316	46305	5749760	0.805338	46943	5762448	0.814636	46568	5837442	0.797747	38776	4873296	0.795683	59608	7269910	0.819928	37958	4634062	0.819109
Bacterial toxins	0.0993966	0.00417134	0.0908818	0.00991147	0.121731	0.121731	0.00851486	-0.00295459	0.0199843		5052	4784502	0.105591	6131	5961362	0.102846	5668	5830473	0.0972134	5891	5829240	0.101059	5403	5603916	0.0964147	4673	5010959	0.0932556	5392	5749760	0.0937778	5762	5762448	0.0999922	4561	5837442	0.0781335	3840	4873296	0.0787968	6541	7269910	0.0899736	4848	4634062	0.104617
Basal transcription factors	0.00193146	0.00036792	0.0013067	0.000433374	0.0344132	0.0344132	0.000624754	5.62529e-05	0.00119325		122	4784502	0.0025499	98	5961362	0.00164392	94	5830473	0.00161222	96	5829240	0.00164687	130	5603916	0.00231981	91	5010959	0.00181602	83	5749760	0.00144354	84	5762448	0.00145771	98	5837442	0.00167882	53	4873296	0.00108756	125	7269910	0.00171942	21	4634062	0.000453166
Base excision repair	0.457514	0.0123893	0.430234	0.0369594	0.167761	0.167761	0.0272804	-0.0151909	0.0697517		22734	4784502	0.475159	28104	5961362	0.471436	26429	5830473	0.453291	26513	5829240	0.454828	25317	5603916	0.451773	21978	5010959	0.438599	25692	5749760	0.446836	26668	5762448	0.462789	23139	5837442	0.396389	18037	4873296	0.370119	31203	7269910	0.429208	22061	4634062	0.476062
Benzoate degradation	0.751701	0.0395616	0.790986	0.0827548	0.369379	0.369379	-0.0392854	-0.135814	0.0572436		35194	4784502	0.735583	40896	5961362	0.686018	44049	5830473	0.755496	42875	5829240	0.735516	45169	5603916	0.806026	39665	5010959	0.791565	44363	5749760	0.771563	41976	5762448	0.72844	50931	5837442	0.872488	43905	4873296	0.90093	59174	7269910	0.813958	30517	4634062	0.658537
beta-Alanine metabolism	0.600342	0.0228064	0.61461	0.0611633	0.641405	0.641405	-0.014268	-0.0847213	0.0561853		28776	4784502	0.601442	33563	5961362	0.563009	35383	5830473	0.606863	34061	5829240	0.584313	35697	5603916	0.637001	30538	5010959	0.609424	34806	5749760	0.605347	32649	5762448	0.566582	39611	5837442	0.678568	34045	4873296	0.698603	44947	7269910	0.618261	24111	4634062	0.520299
beta-Lactam resistance	0.0782354	0.00235547	0.0773899	0.00925678	0.850028	0.850028	0.000845527	-0.00976842	0.0114595		3788	4784502	0.0791723	4865	5961362	0.0816089	4401	5830473	0.0754827	4699	5829240	0.0806109	4285	5603916	0.0764644	3812	5010959	0.0760733	4634	5749760	0.0805947	4850	5762448	0.0841656	3979	5837442	0.0681634	3097	4873296	0.0635504	5599	7269910	0.0770161	4210	4634062	0.090849
Betalain biosynthesis	0.0110819	0.00102173	0.00993083	0.004065	0.563141	0.563141	0.00115106	-0.00350983	0.00581195		590	4784502	0.0123315	730	5961362	0.0122455	578	5830473	0.00991343	649	5829240	0.0111335	627	5603916	0.0111886	485	5010959	0.00967879	680	5749760	0.0118266	791	5762448	0.0137268	407	5837442	0.00697223	135	4873296	0.0027702	710	7269910	0.00976628	673	4634062	0.0145229
Bile secretion	0.00700709	0.0014284	0.00895182	0.00180075	0.0893092	0.0893092	-0.00194473	-0.00425125	0.000361783		306	4784502	0.00639565	287	5961362	0.00481434	384	5830473	0.00658609	406	5829240	0.00696489	435	5603916	0.00776243	477	5010959	0.00951914	431	5749760	0.00749597	429	5762448	0.00744475	488	5837442	0.00835983	581	4873296	0.0119221	795	7269910	0.0109355	350	4634062	0.00755277
Biosynthesis and biodegradation of secondary metabolites	0.0620201	0.00728352	0.0715839	0.00936155	0.103379	0.103379	-0.00956374	-0.0214804	0.00235297		2497	4784502	0.0521893	3433	5961362	0.0575875	3607	5830473	0.0618646	3427	5829240	0.0587898	3733	5603916	0.0666141	3762	5010959	0.0750754	4003	5749760	0.0696203	3742	5762448	0.0649377	4817	5837442	0.082519	3823	4873296	0.0784479	5713	7269910	0.0785842	2567	4634062	0.0553942
Biosynthesis of ansamycins	0.0570009	0.00251829	0.0603226	0.00259855	0.0672392	0.0672392	-0.00332174	-0.00692798	0.000284505		2605	4784502	0.0544466	3354	5961362	0.0562623	3250	5830473	0.0557416	3347	5829240	0.0574174	3130	5603916	0.0558538	3121	5010959	0.0622835	3354	5749760	0.0583329	3316	5762448	0.057545	3665	5837442	0.0627843	3149	4873296	0.0646175	4392	7269910	0.0604134	2699	4634062	0.0582426
Biosynthesis of siderophore group nonribosomal peptides	0.0627371	0.0030136	0.0595589	0.00240098	0.0963983	0.0963983	0.00317823	-0.000687369	0.00704382		3230	4784502	0.0675096	3618	5961362	0.0606908	3498	5830473	0.0599951	3476	5829240	0.0596304	3696	5603916	0.0659539	3139	5010959	0.0626427	3547	5749760	0.0616895	3549	5762448	0.0615884	3643	5837442	0.0624075	2822	4873296	0.0579074	4091	7269910	0.056273	2664	4634062	0.0574874
Biosynthesis of type II polyketide backbone	0.00256131	0.0002887	0.00151414	0.000763417	0.0264912	0.0264912	0.00104717	0.00016743	0.00192691		142	4784502	0.00296792	167	5961362	0.00280137	125	5830473	0.00214391	132	5829240	0.00226445	141	5603916	0.0025161	134	5010959	0.00267414	98	5749760	0.00170442	120	5762448	0.00208245	64	5837442	0.00109637	125	4873296	0.002565	108	7269910	0.00148558	7	4634062	0.000151055
Biosynthesis of type II polyketide products	0.000943083	0.000191881	0.000534356	0.000200766	0.00815902	0.00815902	0.000408727	0.00013192	0.000685534		49	4784502	0.00102414	59	5961362	0.000989707	41	5830473	0.000703202	48	5829240	0.000823435	46	5603916	0.000820855	65	5010959	0.00129716	28	5749760	0.000486977	34	5762448	0.000590027	29	5837442	0.000496793	38	4873296	0.00077976	51	7269910	0.000701522	7	4634062	0.000151055
Biosynthesis of unsaturated fatty acids	0.31328	0.00525739	0.317633	0.00609986	0.255257	0.255257	-0.0043521	-0.0124001	0.00369595		14604	4784502	0.305236	18818	5961362	0.315666	18715	5830473	0.320986	17959	5829240	0.308085	17564	5603916	0.313424	15849	5010959	0.316287	18527	5749760	0.322222	18263	5762448	0.316931	18742	5837442	0.321065	15145	4873296	0.310775	23689	7269910	0.32585	14317	4634062	0.308951
Biosynthesis of vancomycin group antibiotics	0.0489368	0.0016455	0.0488473	0.00612721	0.975911	0.975911	8.94854e-05	-0.00693706	0.00711603		2346	4784502	0.0490333	3111	5961362	0.0521861	2876	5830473	0.049327	2808	5829240	0.0481709	2688	5603916	0.0479665	2352	5010959	0.0469371	2929	5749760	0.0509413	3107	5762448	0.0539181	2535	5837442	0.0434266	1883	4873296	0.0386391	3598	7269910	0.0494917	2626	4634062	0.0566673
Biotin metabolism	0.0957017	0.00501247	0.0883079	0.00530259	0.0469821	0.0469821	0.00739381	0.000119831	0.0146678		5011	4784502	0.104734	5761	5961362	0.096639	5627	5830473	0.0965102	5259	5829240	0.0902176	5407	5603916	0.0964861	4491	5010959	0.0896236	5245	5749760	0.0912212	4964	5762448	0.0861439	5482	5837442	0.093911	4613	4873296	0.0946587	6049	7269910	0.083206	3740	4634062	0.0807067
Bisphenol degradation	0.258319	0.0176956	0.304759	0.0377242	0.041007	0.041007	-0.0464408	-0.0903807	-0.00250082		11934	4784502	0.24943	13615	5961362	0.228387	15247	5830473	0.261505	14735	5829240	0.252777	15474	5603916	0.276128	14115	5010959	0.281683	16758	5749760	0.291456	15768	5762448	0.273634	19585	5837442	0.335507	17449	4873296	0.358053	23447	7269910	0.322521	11464	4634062	0.247386
Bladder cancer	0.0120075	0.000725865	0.011724	0.00276057	0.832013	0.832013	0.000283485	-0.00288206	0.00344903		619	4784502	0.0129376	674	5961362	0.0113061	641	5830473	0.010994	736	5829240	0.012626	702	5603916	0.012527	584	5010959	0.0116545	608	5749760	0.0105744	537	5762448	0.00931896	772	5837442	0.013225	839	4873296	0.0172163	755	7269910	0.0103853	446	4634062	0.00962439
Butanoate metabolism	1.2301	0.0304904	1.24387	0.0906809	0.758218	0.758218	-0.0137741	-0.117984	0.0904358		58030	4784502	1.21287	70313	5961362	1.17948	72534	5830473	1.24405	71132	5829240	1.22026	71509	5603916	1.27605	62530	5010959	1.24786	70088	5749760	1.21897	67611	5762448	1.1733	77882	5837442	1.33418	67130	4873296	1.37751	90761	7269910	1.24845	51476	4634062	1.11082
Butirosin and neomycin biosynthesis	0.0520225	0.00256169	0.0446471	0.00853085	0.114424	0.114424	0.00737545	-0.00241406	0.017165		2619	4784502	0.0547392	3329	5961362	0.0558429	2967	5830473	0.0508878	3042	5829240	0.0521852	2790	5603916	0.0497866	2440	5010959	0.0486933	2763	5749760	0.0480542	2947	5762448	0.0511415	2101	5837442	0.0359918	1543	4873296	0.0316623	3241	7269910	0.044581	2616	4634062	0.0564516
C5-Branched dibasic acid metabolism	0.294184	0.00215402	0.290031	0.00354488	0.0545565	0.0545565	0.00415296	-0.000102387	0.0084083		14049	4784502	0.293636	17441	5961362	0.292567	16988	5830473	0.291366	17313	5829240	0.297003	16649	5603916	0.297096	14704	5010959	0.293437	16653	5749760	0.289629	16838	5762448	0.292202	16740	5837442	0.286769	13879	4873296	0.284797	21168	7269910	0.291173	13699	4634062	0.295615
Caffeine metabolism	0.00396562	0.000585874	0.00544953	0.00108759	0.028718	0.028718	-0.00148391	-0.00276731	-0.000200505		187	4784502	0.00390845	201	5961362	0.00337171	213	5830473	0.00365322	235	5829240	0.0040314	204	5603916	0.00364031	260	5010959	0.00518863	270	5749760	0.00469585	296	5762448	0.00513671	242	5837442	0.00414565	288	4873296	0.00590976	550	7269910	0.00756543	243	4634062	0.00524378
Calcium signaling pathway	5.7183e-06	1.27865e-05	0	0	0.363217	0.363217	5.7183e-06	-8.98106e-06	2.04177e-05		0	4784502	0	0	5961362	0	0	5830473	0	2	5829240	3.43098e-05	0	5603916	0	0	5010959	0	0	5749760	0	0	5762448	0	0	5837442	0	0	4873296	0	0	7269910	0	0	4634062	0
CAM ligands	0	0	0	0	1	1	0	0	0	degenerate case: variance of both groups is zero	0	4784502	0	0	5961362	0	0	5830473	0	0	5829240	0	0	5603916	0	0	5010959	0	0	5749760	0	0	5762448	0	0	5837442	0	0	4873296	0	0	7269910	0	0	4634062	0
Caprolactam degradation	0.373586	0.0198674	0.38913	0.0507129	0.545192	0.545192	-0.015544	-0.0740526	0.0429647		17929	4784502	0.374731	20247	5961362	0.339637	22177	5830473	0.380364	21003	5829240	0.360304	22624	5603916	0.403718	19180	5010959	0.382761	21911	5749760	0.381077	20225	5762448	0.350979	25685	5837442	0.440004	22379	4873296	0.459217	28663	7269910	0.394269	14330	4634062	0.309232
Carbohydrate digestion and absorption	0.00120672	0.000536993	0.00137817	0.00049607	0.611479	0.611479	-0.000171456	-0.00090054	0.000557629		45	4784502	0.000940537	70	5961362	0.00117423	73	5830473	0.00125204	46	5829240	0.000789125	42	5603916	0.000749476	117	5010959	0.00233488	80	5749760	0.00139136	67	5762448	0.0011627	62	5837442	0.00106211	45	4873296	0.0009234	177	7269910	0.00243469	60	4634062	0.00129476
Carbohydrate metabolism	0.129606	0.00256055	0.122965	0.0163215	0.408141	0.408141	0.0066404	-0.0120876	0.0253684		6130	4784502	0.128122	8008	5961362	0.134332	7523	5830473	0.129029	7453	5829240	0.127855	7106	5603916	0.126804	6589	5010959	0.131492	7456	5749760	0.129675	7846	5762448	0.136157	6469	5837442	0.110819	4531	4873296	0.0929761	9273	7269910	0.127553	6516	4634062	0.140611
Carbon fixation in photosynthetic organisms	0.43098	0.00312525	0.441598	0.00848414	0.0373494	0.0373494	-0.0106184	-0.0203879	-0.000848985		20595	4784502	0.430452	25770	5961362	0.432284	25088	5830473	0.430291	25186	5829240	0.432063	23827	5603916	0.425185	21828	5010959	0.435605	25054	5749760	0.43574	24967	5762448	0.433271	26165	5837442	0.448227	22288	4873296	0.45735	31723	7269910	0.43636	20327	4634062	0.438643
Carbon fixation pathways in prokaryotes	0.97716	0.012814	0.950636	0.00966496	0.00468763	0.00468763	0.0265235	0.010365	0.0426821		47697	4784502	0.996906	58545	5961362	0.982074	56700	5830473	0.972477	56722	5829240	0.97306	55113	5603916	0.983473	47853	5010959	0.954967	55017	5749760	0.956857	55366	5762448	0.960807	55706	5837442	0.954288	46223	4873296	0.948496	67663	7269910	0.930727	44146	4634062	0.952642
Cardiac muscle contraction	0.0465328	0.00113352	0.0475761	0.0034685	0.546025	0.546025	-0.0010433	-0.00502747	0.00294088		2266	4784502	0.0473613	2770	5961362	0.0464659	2686	5830473	0.0460683	2827	5829240	0.0484969	2569	5603916	0.0458429	2253	5010959	0.0449615	2641	5749760	0.0459324	2587	5762448	0.0448941	2842	5837442	0.0486857	2672	4873296	0.0548294	3284	7269910	0.0451725	2129	4634062	0.0459424
Carotenoid biosynthesis	0.0807257	0.00180017	0.084482	0.00488175	0.154967	0.154967	-0.00375636	-0.00937783	0.00186512		3868	4784502	0.0808444	4711	5961362	0.0790256	4626	5830473	0.0793418	4925	5829240	0.0844879	4486	5603916	0.0800512	4039	5010959	0.0806033	4801	5749760	0.0834991	5151	5762448	0.0893891	4598	5837442	0.0787674	3894	4873296	0.0799049	6032	7269910	0.0829721	4280	4634062	0.0923596
Cell cycle	0	0	0	0	1	1	0	0	0	degenerate case: variance of both groups is zero	0	4784502	0	0	5961362	0	0	5830473	0	0	5829240	0	0	5603916	0	0	5010959	0	0	5749760	0	0	5762448	0	0	5837442	0	0	4873296	0	0	7269910	0	0	4634062	0
Cell cycle - Caulobacter	0.56078	0.00470518	0.573493	0.0224362	0.265802	0.265802	-0.0127122	-0.0384389	0.0130145		27014	4784502	0.564615	33036	5961362	0.554169	32888	5830473	0.564071	33047	5829240	0.566918	31162	5603916	0.556075	28003	5010959	0.558835	32345	5749760	0.562545	32053	5762448	0.556239	34060	5837442	0.583475	30159	4873296	0.618862	41154	7269910	0.566087	25661	4634062	0.553747
Cell cycle - yeast	0	0	0	0	1	1	0	0	0	degenerate case: variance of both groups is zero	0	4784502	0	0	5961362	0	0	5830473	0	0	5829240	0	0	5603916	0	0	5010959	0	0	5749760	0	0	5762448	0	0	5837442	0	0	4873296	0	0	7269910	0	0	4634062	0
Cell division	0.0554135	0.00043882	0.0561213	0.00239545	0.542715	0.542715	-0.000707787	-0.00345533	0.00203976		2655	4784502	0.0554917	3333	5961362	0.05591	3194	5830473	0.0547811	3237	5829240	0.0555304	3076	5603916	0.0548902	2800	5010959	0.0558775	3150	5749760	0.0547849	3082	5762448	0.0534842	3370	5837442	0.0577308	2956	4873296	0.0606571	4022	7269910	0.0553239	2537	4634062	0.0547468
Cell motility and secretion	0.258793	0.00672384	0.259429	0.0161058	0.937495	0.937495	-0.000635448	-0.0192657	0.0179948		12448	4784502	0.260173	16133	5961362	0.270626	15018	5830473	0.257578	15278	5829240	0.262092	14076	5603916	0.251181	12583	5010959	0.25111	15405	5749760	0.267924	15814	5762448	0.274432	14132	5837442	0.242092	11582	4873296	0.237663	18448	7269910	0.253758	13008	4634062	0.280704
Cellular antigens	0.104453	0.00222917	0.103373	0.00399013	0.611899	0.611899	0.00107988	-0.00365002	0.00580979		4844	4784502	0.101244	6289	5961362	0.105496	5950	5830473	0.10205	6269	5829240	0.107544	5951	5603916	0.106194	5221	5010959	0.104192	6052	5749760	0.105257	6116	5762448	0.106135	5913	5837442	0.101294	4657	4873296	0.0955616	7588	7269910	0.104375	4987	4634062	0.107616
Chagas disease (American trypanosomiasis)	0.0329784	0.00182	0.0302303	0.00542921	0.323759	0.323759	0.00274808	-0.00349082	0.00898697		1724	4784502	0.036033	2046	5961362	0.034321	1829	5830473	0.0313697	1947	5829240	0.0334006	1794	5603916	0.0320133	1540	5010959	0.0307326	1886	5749760	0.0328014	1980	5762448	0.0343604	1470	5837442	0.0251823	1083	4873296	0.0222232	2090	7269910	0.0287486	1764	4634062	0.038066
Chaperones and folding catalysts	0.745019	0.0109761	0.725973	0.0265388	0.183792	0.183792	0.0190457	-0.0116396	0.0497311		35956	4784502	0.75151	45388	5961362	0.76137	43312	5830473	0.742856	43740	5829240	0.750355	40765	5603916	0.727438	36910	5010959	0.736586	41969	5749760	0.729926	43005	5762448	0.746297	40326	5837442	0.690816	33859	4873296	0.694786	52943	7269910	0.728248	35486	4634062	0.765764
Chloroalkane and chloroalkene degradation	0.429981	0.0143984	0.476678	0.0365001	0.0346235	0.0346235	-0.0466973	-0.0888188	-0.00457573		19925	4784502	0.416449	24315	5961362	0.407877	25305	5830473	0.434013	25023	5829240	0.429267	24773	5603916	0.442066	22560	5010959	0.450213	26647	5749760	0.463445	25582	5762448	0.443943	29841	5837442	0.5112	25728	4873296	0.527938	35582	7269910	0.489442	19653	4634062	0.424099
Chlorocyclohexane and chlorobenzene degradation	0.198571	0.0104322	0.228214	0.0141341	0.00422365	0.00422365	-0.0296435	-0.0473566	-0.0119305		8754	4784502	0.182966	11230	5961362	0.18838	11701	5830473	0.200687	11625	5829240	0.199426	11517	5603916	0.205517	10746	5010959	0.21445	12849	5749760	0.22347	12500	5762448	0.216922	14134	5837442	0.242127	11733	4873296	0.240761	17516	7269910	0.240938	9503	4634062	0.205068
Cholinergic synapse	0	0	0	0	1	1	0	0	0	degenerate case: variance of both groups is zero	0	4784502	0	0	5961362	0	0	5830473	0	0	5829240	0	0	5603916	0	0	5010959	0	0	5749760	0	0	5762448	0	0	5837442	0	0	4873296	0	0	7269910	0	0	4634062	0
Chromosome	1.02901	0.0199008	0.981612	0.0438049	0.0635644	0.0635644	0.0474011	-0.00350872	0.0983109		50428	4784502	1.05399	62555	5961362	1.04934	59534	5830473	1.02108	60573	5829240	1.03912	56606	5603916	1.01012	50131	5010959	1.00043	57005	5749760	0.991433	58660	5762448	1.01797	54446	5837442	0.932703	44988	4873296	0.923153	71061	7269910	0.977467	48516	4634062	1.04694
Chronic myeloid leukemia	0.000101652	0.000144835	5.79734e-05	0.000129633	0.626343	0.626343	4.36789e-05	-0.000150328	0.000237686		0	4784502	0	20	5961362	0.000335494	16	5830473	0.00027442	0	5829240	0	0	5603916	0	0	5010959	0	20	5749760	0.000347841	0	5762448	0	0	5837442	0	0	4873296	0	0	7269910	0	0	4634062	0
Circadian rhythm - plant	0.0166879	0.000786075	0.0155144	0.00304952	0.438452	0.438452	0.00117348	-0.00232324	0.00467019		838	4784502	0.0175149	996	5961362	0.0167076	908	5830473	0.0155734	985	5829240	0.0168976	989	5603916	0.0176484	791	5010959	0.0157854	950	5749760	0.0165224	1066	5762448	0.0184991	748	5837442	0.0128138	509	4873296	0.0104447	1142	7269910	0.0157086	885	4634062	0.0190977
Citrate cycle (TCA cycle)	0.688897	0.0115432	0.648672	0.0106033	0.000193274	0.000193274	0.0402254	0.0245918	0.055859		33604	4784502	0.702351	41721	5961362	0.699857	39805	5830473	0.682706	39878	5829240	0.684103	38967	5603916	0.695353	33524	5010959	0.669014	37754	5749760	0.656619	38037	5762448	0.660084	37796	5837442	0.647475	30983	4873296	0.635771	46077	7269910	0.633804	30505	4634062	0.658278
Clavulanic acid biosynthesis	8.56853e-05	4.5874e-05	7.7139e-05	6.56351e-05	0.816758	0.816758	8.54633e-06	-7.25429e-05	8.96356e-05		3	4784502	6.27025e-05	5	5961362	8.38735e-05	0	5830473	0	6	5829240	0.000102929	7	5603916	0.000124913	7	5010959	0.000139694	7	5749760	0.000121744	9	5762448	0.000156184	0	5837442	0	7	4873296	0.00014364	3	7269910	4.1266e-05	0	4634062	0
Colorectal cancer	0.041431	0.00233356	0.0493759	0.00644124	0.0393225	0.0393225	-0.0079449	-0.0153587	-0.000531054		1804	4784502	0.0377051	2341	5961362	0.0392695	2438	5830473	0.0418148	2466	5829240	0.042304	2389	5603916	0.0426309	2248	5010959	0.0448617	2711	5749760	0.0471498	2486	5762448	0.0431414	3240	5837442	0.0555038	2882	4873296	0.0591386	3663	7269910	0.0503858	1897	4634062	0.040936
Complement and coagulation cascades	0	0	0	0	1	1	0	0	0	degenerate case: variance of both groups is zero	0	4784502	0	0	5961362	0	0	5830473	0	0	5829240	0	0	5603916	0	0	5010959	0	0	5749760	0	0	5762448	0	0	5837442	0	0	4873296	0	0	7269910	0	0	4634062	0
Cyanoamino acid metabolism	0.311814	0.0025122	0.305338	0.0141016	0.355821	0.355821	0.0064757	-0.00969969	0.0226511		14688	4784502	0.306991	18705	5961362	0.313771	18120	5830473	0.310781	18276	5829240	0.313523	17452	5603916	0.311425	15754	5010959	0.314391	17911	5749760	0.311509	18254	5762448	0.316775	17326	5837442	0.296808	13593	4873296	0.278928	22304	7269910	0.306799	14885	4634062	0.321208
Cysteine and methionine metabolism	0.760601	0.0115807	0.748689	0.0339826	0.485508	0.485508	0.0119122	-0.0271498	0.0509741		36734	4784502	0.767771	46375	5961362	0.777926	43256	5830473	0.741895	44669	5829240	0.766292	42390	5603916	0.756435	37747	5010959	0.753289	43819	5749760	0.762101	44661	5762448	0.775035	41910	5837442	0.717951	33973	4873296	0.697126	53954	7269910	0.742155	36969	4634062	0.797767
Cytochrome P450	0.000435265	0.000441833	0.000277462	0.000206312	0.492503	0.492503	0.000157803	-0.00035666	0.000672267		60	4784502	0.00125405	11	5961362	0.000184522	19	5830473	0.000325874	0	5829240	0	43	5603916	0.000767321	4	5010959	7.9825e-05	32	5749760	0.000556545	25	5762448	0.000433843	24	5837442	0.000411139	0	4873296	0	16	7269910	0.000220085	2	4634062	4.31587e-05
Cytokine receptors	0	0	0	0	1	1	0	0	0	degenerate case: variance of both groups is zero	0	4784502	0	0	5961362	0	0	5830473	0	0	5829240	0	0	5603916	0	0	5010959	0	0	5749760	0	0	5762448	0	0	5837442	0	0	4873296	0	0	7269910	0	0	4634062	0
Cytokine-cytokine receptor interaction	0	0	0	0	1	1	0	0	0	degenerate case: variance of both groups is zero	0	4784502	0	0	5961362	0	0	5830473	0	0	5829240	0	0	5603916	0	0	5010959	0	0	5749760	0	0	5762448	0	0	5837442	0	0	4873296	0	0	7269910	0	0	4634062	0
Cytoskeleton proteins	0.187764	0.00320537	0.181486	0.00353169	0.0148424	0.0148424	0.00627786	0.00151935	0.0110364		9171	4784502	0.191681	11155	5961362	0.187122	11061	5830473	0.18971	11060	5829240	0.189733	10460	5603916	0.186655	9104	5010959	0.181682	10314	5749760	0.179381	10508	5762448	0.182353	10256	5837442	0.175693	8838	4873296	0.181356	13288	7269910	0.182781	8682	4634062	0.187352
Cytosolic DNA-sensing pathway	0	0	0	0	1	1	0	0	0	degenerate case: variance of both groups is zero	0	4784502	0	0	5961362	0	0	5830473	0	0	5829240	0	0	5603916	0	0	5010959	0	0	5749760	0	0	5762448	0	0	5837442	0	0	4873296	0	0	7269910	0	0	4634062	0
D-Alanine metabolism	0.0730157	0.000762672	0.0715677	0.00157912	0.106096	0.106096	0.00144801	-0.000395457	0.00329148		3507	4784502	0.0732992	4406	5961362	0.0739093	4304	5830473	0.0738191	4250	5829240	0.0729083	4057	5603916	0.0723958	3596	5010959	0.0717627	4083	5749760	0.0710117	4097	5762448	0.0710983	4221	5837442	0.0723091	3640	4873296	0.0746928	5085	7269910	0.0699458	3260	4634062	0.0703486
D-Arginine and D-ornithine metabolism	0.0122629	0.000333969	0.0133221	0.00265553	0.415519	0.415519	-0.00105925	-0.00410793	0.00198943		596	4784502	0.0124569	687	5961362	0.0115242	722	5830473	0.0123832	721	5829240	0.0123687	700	5603916	0.0124913	619	5010959	0.0123529	695	5749760	0.0120875	628	5762448	0.0108981	898	5837442	0.0153835	880	4873296	0.0180576	948	7269910	0.0130401	485	4634062	0.010466
D-Glutamine and D-glutamate metabolism	0.107476	0.00211104	0.104368	0.00680721	0.367489	0.367489	0.00310769	-0.00470634	0.0109217		5284	4784502	0.11044	6556	5961362	0.109975	6259	5830473	0.10735	6221	5829240	0.106721	5863	5603916	0.104623	5299	5010959	0.105748	6105	5749760	0.106178	6303	5762448	0.109381	5630	5837442	0.0964464	4639	4873296	0.0951922	7598	7269910	0.104513	5306	4634062	0.1145
Dilated cardiomyopathy (DCM)	0	0	0	0	1	1	0	0	0	degenerate case: variance of both groups is zero	0	4784502	0	0	5961362	0	0	5830473	0	0	5829240	0	0	5603916	0	0	5010959	0	0	5749760	0	0	5762448	0	0	5837442	0	0	4873296	0	0	7269910	0	0	4634062	0
Dioxin degradation	0.0879655	0.00383767	0.0890817	0.00458108	0.685285	0.685285	-0.00111625	-0.00709606	0.00486356		4180	4784502	0.0873654	4877	5961362	0.0818102	5126	5830473	0.0879174	4984	5829240	0.0855	5148	5603916	0.0918643	4677	5010959	0.0933354	5072	5749760	0.0882124	4893	5762448	0.0849118	5516	5837442	0.0944934	4555	4873296	0.0934686	6659	7269910	0.0915967	3791	4634062	0.0818073
DNA repair and recombination proteins	2.01043	0.0486286	1.90367	0.116782	0.103078	0.103078	0.106765	-0.0283054	0.241836		99570	4784502	2.08109	122925	5961362	2.06203	116291	5830473	1.99454	117177	5829240	2.01016	110704	5603916	1.97548	97178	5010959	1.93931	111942	5749760	1.9469	115574	5762448	2.00564	103998	5837442	1.78157	84421	4873296	1.73232	137636	7269910	1.89323	95571	4634062	2.06236
DNA replication	0.37285	0.00945521	0.354526	0.014009	0.0389992	0.0389992	0.0183246	0.0011584	0.0354909		18515	4784502	0.386979	22750	5961362	0.381624	21587	5830473	0.370244	21777	5829240	0.373582	20527	5603916	0.366297	17958	5010959	0.358375	20613	5749760	0.358502	21143	5762448	0.36691	19742	5837442	0.338196	16468	4873296	0.337923	25444	7269910	0.349991	17407	4634062	0.375632
DNA replication proteins	0.646245	0.0169593	0.61375	0.0306206	0.0724557	0.0724557	0.0324946	-0.00376224	0.0687514		31989	4784502	0.668596	39664	5961362	0.665351	37429	5830473	0.641955	37802	5829240	0.648489	35420	5603916	0.632058	31119	5010959	0.621019	35851	5749760	0.623522	36908	5762448	0.640492	33945	5837442	0.581505	27947	4873296	0.573472	43934	7269910	0.604327	30547	4634062	0.659184
Drug metabolism - cytochrome P450	0.354937	0.0180265	0.400668	0.049504	0.0979852	0.0979852	-0.045731	-0.102717	0.0112552		15997	4784502	0.33435	19563	5961362	0.328163	21063	5830473	0.361257	21042	5829240	0.360973	20437	5603916	0.364691	19051	5010959	0.380187	21731	5749760	0.377946	20491	5762448	0.355595	25453	5837442	0.43603	23575	4873296	0.483759	29967	7269910	0.412206	15685	4634062	0.338472
Drug metabolism - other enzymes	0.214021	0.00446164	0.205397	0.0163754	0.301089	0.301089	0.008624	-0.010156	0.027404		10426	4784502	0.217912	13144	5961362	0.220487	12087	5830473	0.207307	12556	5829240	0.215397	11921	5603916	0.212726	10538	5010959	0.210299	11972	5749760	0.208217	12550	5762448	0.217789	11076	5837442	0.189741	8789	4873296	0.18035	15046	7269910	0.206963	10627	4634062	0.229324
ECM-receptor interaction	0	0	0	0	1	1	0	0	0	degenerate case: variance of both groups is zero	0	4784502	0	0	5961362	0	0	5830473	0	0	5829240	0	0	5603916	0	0	5010959	0	0	5749760	0	0	5762448	0	0	5837442	0	0	4873296	0	0	7269910	0	0	4634062	0
Electron transfer carriers	0.0354361	0.00185714	0.0357112	0.0019907	0.825788	0.825788	-0.000275141	-0.00298973	0.00243945		1609	4784502	0.0336294	2011	5961362	0.0337339	1951	5830473	0.0334621	2145	5829240	0.0367972	2080	5603916	0.0371169	1898	5010959	0.037877	1981	5749760	0.0344536	1948	5762448	0.0338051	2215	5837442	0.0379447	1900	4873296	0.038988	2496	7269910	0.0343333	1610	4634062	0.0347427
Endocrine and other factor-regulated calcium reabsorption	0	0	0	0	1	1	0	0	0	degenerate case: variance of both groups is zero	0	4784502	0	0	5961362	0	0	5830473	0	0	5829240	0	0	5603916	0	0	5010959	0	0	5749760	0	0	5762448	0	0	5837442	0	0	4873296	0	0	7269910	0	0	4634062	0
Endocytosis	0.000100429	0.000168966	3.59656e-06	8.04215e-06	0.256468	0.256468	9.68327e-05	-9.73663e-05	0.000291032		22	4784502	0.000459818	0	5961362	0	0	5830473	0	0	5829240	0	8	5603916	0.000142757	0	5010959	0	0	5749760	0	0	5762448	0	0	5837442	0	0	4873296	0	0	7269910	0	1	4634062	2.15793e-05
Energy metabolism	0.84635	0.0143021	0.899886	0.0378668	0.0235148	0.0235148	-0.0535354	-0.0971703	-0.0099005		39461	4784502	0.824767	49740	5961362	0.834373	50002	5830473	0.857598	49162	5829240	0.843369	47632	5603916	0.849977	43496	5010959	0.868017	51177	5749760	0.890072	50111	5762448	0.869613	55002	5837442	0.942228	46323	4873296	0.950548	65697	7269910	0.903684	39073	4634062	0.84317
Epithelial cell signaling in Helicobacter pylori infection	0.0267138	0.0013239	0.0313185	0.00493253	0.0927402	0.0927402	-0.00460467	-0.0102612	0.00105183		1183	4784502	0.0247257	1572	5961362	0.0263698	1654	5830473	0.0283682	1522	5829240	0.0261098	1470	5603916	0.0262317	1427	5010959	0.0284776	1738	5749760	0.0302273	1588	5762448	0.0275577	2171	5837442	0.0371909	1891	4873296	0.0388033	2070	7269910	0.0284735	1189	4634062	0.0256578
ErbB signaling pathway	0	0	0	0	1	1	0	0	0	degenerate case: variance of both groups is zero	0	4784502	0	0	5961362	0	0	5830473	0	0	5829240	0	0	5603916	0	0	5010959	0	0	5749760	0	0	5762448	0	0	5837442	0	0	4873296	0	0	7269910	0	0	4634062	0
Ether lipid metabolism	0.0439746	0.0014723	0.0392929	0.00994166	0.343402	0.343402	0.00468172	-0.00672741	0.0160909		2188	4784502	0.045731	2728	5961362	0.0457614	2457	5830473	0.0421407	2599	5829240	0.0445856	2421	5603916	0.0432019	2126	5010959	0.042427	2406	5749760	0.0418452	2731	5762448	0.0473931	1634	5837442	0.0279917	1194	4873296	0.0245009	3036	7269910	0.0417612	2422	4634062	0.0522652
Ethylbenzene degradation	0.0921791	0.00365535	0.0983362	0.0108329	0.272973	0.272973	-0.00615716	-0.018607	0.00629267		4377	4784502	0.0914829	5085	5961362	0.0852993	5405	5830473	0.0927026	5323	5829240	0.0913155	5389	5603916	0.0961649	4816	5010959	0.0961093	5317	5749760	0.0924734	5169	5762448	0.0897015	6082	5837442	0.104189	5709	4873296	0.117149	7420	7269910	0.102065	3913	4634062	0.08444
Fat digestion and absorption	0	0	0	0	1	1	0	0	0	degenerate case: variance of both groups is zero	0	4784502	0	0	5961362	0	0	5830473	0	0	5829240	0	0	5603916	0	0	5010959	0	0	5749760	0	0	5762448	0	0	5837442	0	0	4873296	0	0	7269910	0	0	4634062	0
Fatty acid biosynthesis	0.5589	0.00347719	0.549995	0.00613711	0.0226475	0.0226475	0.00890495	0.00161623	0.0161937		26842	4784502	0.56102	33575	5961362	0.56321	32677	5830473	0.560452	32666	5829240	0.560382	31043	5603916	0.553952	27780	5010959	0.554385	31591	5749760	0.549432	31968	5762448	0.554764	31641	5837442	0.542035	26402	4873296	0.541769	40438	7269910	0.556238	25753	4634062	0.555733
Fatty acid elongation in mitochondria	0	0	2.78897e-05	4.09283e-05	0.188084	0.188084	-2.78897e-05	-7.49408e-05	1.91615e-05		0	4784502	0	0	5961362	0	0	5830473	0	0	5829240	0	0	5603916	0	0	5010959	0	0	5749760	0	0	5762448	0	0	5837442	0	5	4873296	0.0001026	0	7269910	0	3	4634062	6.4738e-05
Fatty acid metabolism	0.967257	0.0341499	0.979097	0.0875667	0.78697	0.78697	-0.0118396	-0.112851	0.0891717		46852	4784502	0.979245	54235	5961362	0.909775	57194	5830473	0.98095	54797	5829240	0.940037	57033	5603916	1.01773	48897	5010959	0.975801	55521	5749760	0.965623	52671	5762448	0.914039	62477	5837442	1.07028	53581	4873296	1.09948	71468	7269910	0.983066	39023	4634062	0.842091
Fc epsilon RI signaling pathway	0	0	0	0	1	1	0	0	0	degenerate case: variance of both groups is zero	0	4784502	0	0	5961362	0	0	5830473	0	0	5829240	0	0	5603916	0	0	5010959	0	0	5749760	0	0	5762448	0	0	5837442	0	0	4873296	0	0	7269910	0	0	4634062	0
Fc gamma R-mediated phagocytosis	0.000100429	0.000168966	3.59656e-06	8.04215e-06	0.256468	0.256468	9.68327e-05	-9.73663e-05	0.000291032		22	4784502	0.000459818	0	5961362	0	0	5830473	0	0	5829240	0	8	5603916	0.000142757	0	5010959	0	0	5749760	0	0	5762448	0	0	5837442	0	0	4873296	0	0	7269910	0	1	4634062	2.15793e-05
Flagellar assembly	0.742169	0.0191933	0.72058	0.0481552	0.384769	0.384769	0.0215892	-0.0340041	0.0771825		35637	4784502	0.744842	45462	5961362	0.762611	43243	5830473	0.741672	44632	5829240	0.765657	40816	5603916	0.728348	35572	5010959	0.709884	41785	5749760	0.726726	43566	5762448	0.756033	38894	5837442	0.666285	32349	4873296	0.663801	51646	7269910	0.710408	37083	4634062	0.800227
Flavone and flavonol biosynthesis	0.0116017	0.000786103	0.00937954	0.0039653	0.269926	0.269926	0.00222217	-0.00232515	0.00676949		588	4784502	0.0122897	757	5961362	0.0126984	684	5830473	0.0117315	676	5829240	0.0115967	614	5603916	0.0109566	518	5010959	0.0103373	609	5749760	0.0105917	735	5762448	0.012755	328	5837442	0.0056189	159	4873296	0.00326268	669	7269910	0.00920231	688	4634062	0.0148466
Flavonoid biosynthesis	0.0378274	0.00128301	0.0376352	0.00579269	0.944812	0.944812	0.000192231	-0.00644953	0.00683399		1833	4784502	0.0383112	2302	5961362	0.0386153	2091	5830473	0.0358633	2234	5829240	0.038324	2213	5603916	0.0394902	1822	5010959	0.0363603	2311	5749760	0.040193	2483	5762448	0.0430893	1962	5837442	0.0336106	1310	4873296	0.0268812	2817	7269910	0.0387488	2006	4634062	0.0432882
Fluorobenzoate degradation	0.109138	0.00551506	0.122875	0.00598518	0.0036793	0.0036793	-0.0137371	-0.0218543	-0.00561994		4846	4784502	0.101285	6183	5961362	0.103718	6414	5830473	0.110008	6391	5829240	0.109637	6274	5603916	0.111957	5924	5010959	0.118221	6940	5749760	0.120701	6819	5762448	0.118335	7540	5837442	0.129166	6110	4873296	0.125377	9469	7269910	0.130249	5256	4634062	0.113421
Focal adhesion	0	0	0	0	1	1	0	0	0	degenerate case: variance of both groups is zero	0	4784502	0	0	5961362	0	0	5830473	0	0	5829240	0	0	5603916	0	0	5010959	0	0	5749760	0	0	5762448	0	0	5837442	0	0	4873296	0	0	7269910	0	0	4634062	0
Folate biosynthesis	0.367865	0.00961705	0.350715	0.0137001	0.047802	0.047802	0.0171501	0.000206108	0.0340942		18268	4784502	0.381816	22497	5961362	0.37738	21399	5830473	0.36702	21385	5829240	0.366857	20242	5603916	0.361212	17684	5010959	0.352906	20576	5749760	0.357858	20758	5762448	0.360229	19630	5837442	0.336277	16189	4873296	0.332198	25198	7269910	0.346607	17198	4634062	0.371121
Fructose and mannose metabolism	0.545986	0.0110158	0.559304	0.0158884	0.158222	0.158222	-0.0133182	-0.0329093	0.00627292		25781	4784502	0.538844	32318	5961362	0.542124	31614	5830473	0.54222	31657	5829240	0.543073	30221	5603916	0.539284	28581	5010959	0.57037	32164	5749760	0.559397	32453	5762448	0.563181	31636	5837442	0.54195	26170	4873296	0.537008	41544	7269910	0.571451	27009	4634062	0.582836
Function unknown	1.52336	0.014952	1.51626	0.0388023	0.714743	0.714743	0.00710353	-0.0376379	0.0518449		72554	4784502	1.51644	92063	5961362	1.54433	88133	5830473	1.51159	89239	5829240	1.53089	84114	5603916	1.50099	76965	5010959	1.53593	87766	5749760	1.52643	88867	5762448	1.54217	85967	5837442	1.47268	71179	4873296	1.46059	110696	7269910	1.52266	72894	4634062	1.573
G protein-coupled receptors	0	0	0	0	1	1	0	0	0	degenerate case: variance of both groups is zero	0	4784502	0	0	5961362	0	0	5830473	0	0	5829240	0	0	5603916	0	0	5010959	0	0	5749760	0	0	5762448	0	0	5837442	0	0	4873296	0	0	7269910	0	0	4634062	0
Galactose metabolism	0.461014	0.0128275	0.432637	0.075959	0.445674	0.445674	0.0283774	-0.0587643	0.115519		22540	4784502	0.471104	28760	5961362	0.48244	26094	5830473	0.447545	27016	5829240	0.463457	25047	5603916	0.446955	22779	5010959	0.454584	26217	5749760	0.455967	28412	5762448	0.493054	21054	5837442	0.360672	15182	4873296	0.311535	31938	7269910	0.439318	24805	4634062	0.535276
Gastric acid secretion	0	0	0	0	1	1	0	0	0	degenerate case: variance of both groups is zero	0	4784502	0	0	5961362	0	0	5830473	0	0	5829240	0	0	5603916	0	0	5010959	0	0	5749760	0	0	5762448	0	0	5837442	0	0	4873296	0	0	7269910	0	0	4634062	0
General function prediction only	3.35644	0.0297774	3.30404	0.0747201	0.191384	0.191384	0.0524035	-0.0338575	0.138665		161924	4784502	3.38434	202884	5961362	3.40332	194845	5830473	3.34184	195295	5829240	3.35027	187578	5603916	3.34727	165944	5010959	3.31162	191900	5749760	3.33753	193957	5762448	3.36588	188372	5837442	3.22696	155623	4873296	3.19338	239545	7269910	3.29502	157811	4634062	3.40546
Geraniol degradation	0.526415	0.0257236	0.545071	0.0680311	0.585841	0.585841	-0.018656	-0.0970526	0.0597407		25607	4784502	0.535207	28804	5961362	0.483178	31125	5830473	0.533833	29589	5829240	0.507596	31725	5603916	0.566122	26686	5010959	0.532553	30755	5749760	0.534892	28602	5762448	0.496352	35954	5837442	0.61592	31147	4873296	0.639136	39689	7269910	0.545935	20306	4634062	0.43819
Germination	0.000814159	0.000502716	0.000866835	0.000754897	0.89962	0.89962	-5.26767e-05	-0.000974974	0.000869621		61	4784502	0.00127495	94	5961362	0.00157682	42	5830473	0.000720353	37	5829240	0.000634731	38	5603916	0.000678097	0	5010959	0	0	5749760	0	57	5762448	0.000989163	19	5837442	0.000325485	37	4873296	0.00075924	174	7269910	0.00239343	34	4634062	0.000733698
Glioma	0	0	0	0	1	1	0	0	0	degenerate case: variance of both groups is zero	0	4784502	0	0	5961362	0	0	5830473	0	0	5829240	0	0	5603916	0	0	5010959	0	0	5749760	0	0	5762448	0	0	5837442	0	0	4873296	0	0	7269910	0	0	4634062	0
Glutamatergic synapse	0.0912344	0.00214662	0.0890283	0.00402369	0.312376	0.312376	0.00220612	-0.00253667	0.00694891		4553	4784502	0.0951614	5423	5961362	0.0909691	5322	5830473	0.091279	5257	5829240	0.0901833	5147	5603916	0.0918465	4408	5010959	0.0879672	5163	5749760	0.0897951	4950	5762448	0.085901	5375	5837442	0.092078	4671	4873296	0.0958489	6114	7269910	0.0841001	4006	4634062	0.0864468
Glutathione metabolism	0.556889	0.0163044	0.597862	0.0511639	0.138817	0.138817	-0.0409725	-0.0997226	0.0177776		25611	4784502	0.535291	31925	5961362	0.535532	32663	5830473	0.560212	33247	5829240	0.570349	31476	5603916	0.561679	28977	5010959	0.578273	32938	5749760	0.572859	31768	5762448	0.551293	36978	5837442	0.633462	33520	4873296	0.68783	43853	7269910	0.603212	24955	4634062	0.538512
Glycan bindng proteins	0	0	0	0	1	1	0	0	0	degenerate case: variance of both groups is zero	0	4784502	0	0	5961362	0	0	5830473	0	0	5829240	0	0	5603916	0	0	5010959	0	0	5749760	0	0	5762448	0	0	5837442	0	0	4873296	0	0	7269910	0	0	4634062	0
Glycan biosynthesis and metabolism	0.050546	0.000982612	0.0491547	0.0029183	0.350595	0.350595	0.00139136	-0.00196242	0.00474513		2399	4784502	0.0501411	3051	5961362	0.0511796	2888	5830473	0.0495329	3003	5829240	0.0515161	2756	5603916	0.0491799	2592	5010959	0.0517266	2861	5749760	0.0497586	2970	5762448	0.0515406	2695	5837442	0.0461675	2175	4873296	0.044631	3618	7269910	0.0497668	2459	4634062	0.0530636
Glycerolipid metabolism	0.293331	0.00321671	0.282301	0.0140061	0.141182	0.141182	0.0110295	-0.00502914	0.0270882		14275	4784502	0.298359	17627	5961362	0.295687	17008	5830473	0.291709	16806	5829240	0.288305	16487	5603916	0.294205	14618	5010959	0.291721	16508	5749760	0.287108	16928	5762448	0.293764	15737	5837442	0.269587	12591	4873296	0.258367	20803	7269910	0.286152	13848	4634062	0.298831
Glycerophospholipid metabolism	0.488969	0.0094054	0.479039	0.0283961	0.48557	0.48557	0.00993007	-0.0226944	0.0425545		23808	4784502	0.497607	29982	5961362	0.502939	28449	5830473	0.487936	28571	5829240	0.490133	26769	5603916	0.477684	23928	5010959	0.477513	28109	5749760	0.488873	29067	5762448	0.504421	26363	5837442	0.451619	21261	4873296	0.436276	34550	7269910	0.475247	23995	4634062	0.517796
Glycolysis / Gluconeogenesis	0.928125	0.00840045	0.898191	0.00780919	0.000168175	0.000168175	0.0299344	0.0184972	0.0413715		45121	4784502	0.943066	55492	5961362	0.930861	53986	5830473	0.925928	53482	5829240	0.917478	52190	5603916	0.931313	46106	5010959	0.920103	51944	5749760	0.903412	51940	5762448	0.901353	52058	5837442	0.891795	43105	4873296	0.884514	65430	7269910	0.900011	42080	4634062	0.908059
Glycosaminoglycan biosynthesis - chondroitin sulfate	0	0	0	0	1	1	0	0	0	degenerate case: variance of both groups is zero	0	4784502	0	0	5961362	0	0	5830473	0	0	5829240	0	0	5603916	0	0	5010959	0	0	5749760	0	0	5762448	0	0	5837442	0	0	4873296	0	0	7269910	0	0	4634062	0
Glycosaminoglycan degradation	0.0378696	0.00252023	0.0314129	0.0122013	0.29497	0.29497	0.00645677	-0.00753437	0.0204479		1926	4784502	0.040255	2508	5961362	0.0420709	2159	5830473	0.0370296	2179	5829240	0.0373805	1977	5603916	0.0352789	1764	5010959	0.0352028	2094	5749760	0.0364189	2382	5762448	0.0413366	1073	5837442	0.0183813	604	4873296	0.0123941	2414	7269910	0.0332054	2166	4634062	0.0467409
Glycosphingolipid biosynthesis - ganglio series	0.0246265	0.00180876	0.0202811	0.00791835	0.280421	0.280421	0.00434543	-0.00473333	0.0134242		1274	4784502	0.0266276	1627	5961362	0.0272924	1339	5830473	0.0229655	1456	5829240	0.0249775	1287	5603916	0.0229661	1149	5010959	0.0229297	1334	5749760	0.023201	1555	5762448	0.0269851	698	5837442	0.0119573	391	4873296	0.00802332	1535	7269910	0.0211144	1409	4634062	0.0304053
Glycosphingolipid biosynthesis - globo series	0.0556704	0.00293031	0.0489452	0.0167374	0.414455	0.414455	0.00672519	-0.0124746	0.0259249		2767	4784502	0.0578326	3618	5961362	0.0606908	3109	5830473	0.0533233	3256	5829240	0.0558563	2905	5603916	0.0518387	2730	5010959	0.0544806	3105	5749760	0.0540023	3596	5762448	0.062404	1834	5837442	0.0314179	1131	4873296	0.0232081	3734	7269910	0.0513624	3303	4634062	0.0712766
Glycosphingolipid biosynthesis - lacto and neolacto series	0	0	0	0	1	1	0	0	0	degenerate case: variance of both groups is zero	0	4784502	0	0	5961362	0	0	5830473	0	0	5829240	0	0	5603916	0	0	5010959	0	0	5749760	0	0	5762448	0	0	5837442	0	0	4873296	0	0	7269910	0	0	4634062	0
Glycosylphosphatidylinositol(GPI)-anchor biosynthesis	0	0	0	0	1	1	0	0	0	degenerate case: variance of both groups is zero	0	4784502	0	0	5961362	0	0	5830473	0	0	5829240	0	0	5603916	0	0	5010959	0	0	5749760	0	0	5762448	0	0	5837442	0	0	4873296	0	0	7269910	0	0	4634062	0
Glycosyltransferases	0.366242	0.00743514	0.361364	0.0283002	0.722845	0.722845	0.00487741	-0.0275743	0.0373291		17757	4784502	0.371136	22625	5961362	0.379527	21226	5830473	0.364053	21267	5829240	0.364833	20284	5603916	0.361961	17836	5010959	0.35594	21659	5749760	0.376694	22259	5762448	0.386277	19880	5837442	0.34056	15260	4873296	0.313135	25885	7269910	0.356057	18326	4634062	0.395463
Glyoxylate and dicarboxylate metabolism	0.914214	0.013334	0.949414	0.0641542	0.27942	0.27942	-0.0352	-0.108764	0.0383642		43035	4784502	0.899467	53267	5961362	0.893537	53838	5830473	0.92339	53359	5829240	0.915368	52118	5603916	0.930028	46276	5010959	0.923496	53465	5749760	0.929865	51702	5762448	0.897223	59452	5837442	1.01846	51056	4873296	1.04767	68170	7269910	0.937701	40111	4634062	0.865569
GnRH signaling pathway	0.000100429	0.000168966	3.59656e-06	8.04215e-06	0.256468	0.256468	9.68327e-05	-9.73663e-05	0.000291032		22	4784502	0.000459818	0	5961362	0	0	5830473	0	0	5829240	0	8	5603916	0.000142757	0	5010959	0	0	5749760	0	0	5762448	0	0	5837442	0	0	4873296	0	0	7269910	0	1	4634062	2.15793e-05
GTP-binding proteins	0	0	0	0	1	1	0	0	0	degenerate case: variance of both groups is zero	0	4784502	0	0	5961362	0	0	5830473	0	0	5829240	0	0	5603916	0	0	5010959	0	0	5749760	0	0	5762448	0	0	5837442	0	0	4873296	0	0	7269910	0	0	4634062	0
Hedgehog signaling pathway	0	0	0	0	1	1	0	0	0	degenerate case: variance of both groups is zero	0	4784502	0	0	5961362	0	0	5830473	0	0	5829240	0	0	5603916	0	0	5010959	0	0	5749760	0	0	5762448	0	0	5837442	0	0	4873296	0	0	7269910	0	0	4634062	0
Hematopoietic cell lineage	3.77268e-05	5.60198e-05	2.29255e-05	5.12631e-05	0.672273	0.672273	1.48012e-05	-6.09449e-05	9.05473e-05		4	4784502	8.36033e-05	0	5961362	0	0	5830473	0	0	5829240	0	8	5603916	0.000142757	0	5010959	0	0	5749760	0	0	5762448	0	0	5837442	0	0	4873296	0	10	7269910	0.000137553	0	4634062	0
Hepatitis C	0	0	0	0	1	1	0	0	0	degenerate case: variance of both groups is zero	0	4784502	0	0	5961362	0	0	5830473	0	0	5829240	0	0	5603916	0	0	5010959	0	0	5749760	0	0	5762448	0	0	5837442	0	0	4873296	0	0	7269910	0	0	4634062	0
Histidine metabolism	0.566052	0.0086941	0.55574	0.0149562	0.219128	0.219128	0.0103122	-0.00751582	0.0281402		27595	4784502	0.576758	34050	5961362	0.571178	32555	5830473	0.55836	32864	5829240	0.563778	32159	5603916	0.573867	27679	5010959	0.552369	32384	5749760	0.563224	32782	5762448	0.56889	31773	5837442	0.544297	25823	4873296	0.529888	40327	7269910	0.554711	26573	4634062	0.573428
Homologous recombination	0.496409	0.0114644	0.470074	0.0164299	0.016631	0.016631	0.0263348	0.00604454	0.046625		24574	4784502	0.513617	30254	5961362	0.507501	28747	5830473	0.493047	28906	5829240	0.495879	27441	5603916	0.489675	23989	5010959	0.478731	27318	5749760	0.475115	27968	5762448	0.485349	26421	5837442	0.452613	21965	4873296	0.450722	33573	7269910	0.461808	22931	4634062	0.494836
Huntington's disease	0.123993	0.00100797	0.133551	0.0071065	0.0294161	0.0294161	-0.00955794	-0.0177143	-0.00140158		5857	4784502	0.122416	7338	5961362	0.123093	7245	5830473	0.124261	7256	5829240	0.124476	6957	5603916	0.124145	6292	5010959	0.125565	7605	5749760	0.132266	7322	5762448	0.127064	8219	5837442	0.140798	7031	4873296	0.144276	9662	7269910	0.132904	5746	4634062	0.123995
Hypertrophic cardiomyopathy (HCM)	0.0103282	0.000967133	0.00855157	0.00375769	0.347669	0.347669	0.00177661	-0.00253211	0.00608532		544	4784502	0.01137	688	5961362	0.011541	538	5830473	0.00922738	628	5829240	0.0107733	558	5603916	0.00995732	456	5010959	0.00910005	598	5749760	0.0104004	644	5762448	0.0111758	305	5837442	0.00522489	131	4873296	0.00268812	576	7269910	0.00792307	644	4634062	0.0138971
Indole alkaloid biosynthesis	0.0104701	0.00120614	0.00838585	0.00348695	0.252101	0.252101	0.00208428	-0.00192501	0.00609358		547	4784502	0.0114327	727	5961362	0.0121952	559	5830473	0.00958756	627	5829240	0.0107561	581	5603916	0.0103677	425	5010959	0.00848141	590	5749760	0.0102613	669	5762448	0.0116096	357	5837442	0.00611569	135	4873296	0.0027702	490	7269910	0.00674011	594	4634062	0.0128181
Influenza A	0.0416472	0.00236789	0.0495614	0.00648782	0.0409224	0.0409224	-0.00791417	-0.015383	-0.000445308		1812	4784502	0.0378723	2356	5961362	0.0395212	2449	5830473	0.0420035	2478	5829240	0.0425098	2396	5603916	0.0427558	2266	5010959	0.0452209	2711	5749760	0.0471498	2493	5762448	0.0432629	3251	5837442	0.0556922	2893	4873296	0.0593643	3694	7269910	0.0508122	1904	4634062	0.0410871
Inorganic ion transport and metabolism	0.41053	0.00772802	0.40863	0.0130912	0.786857	0.786857	0.00190022	-0.0137412	0.0175417		19390	4784502	0.405267	25304	5961362	0.424467	23596	5830473	0.404701	24331	5829240	0.417396	22847	5603916	0.407697	20227	5010959	0.403655	24002	5749760	0.417444	24148	5762448	0.419058	23900	5837442	0.409426	18835	4873296	0.386494	28823	7269910	0.39647	19597	4634062	0.42289
Inositol phosphate metabolism	0.2305	0.00209977	0.218234	0.00972609	0.0363889	0.0363889	0.0122658	0.00111381	0.0234179		11113	4784502	0.232271	13788	5961362	0.231289	13539	5830473	0.232211	13201	5829240	0.226462	12837	5603916	0.229072	11610	5010959	0.231692	12568	5749760	0.218583	13061	5762448	0.226657	12138	5837442	0.207934	9895	4873296	0.203045	16243	7269910	0.223428	10647	4634062	0.229755
Insulin signaling pathway	0.0506875	0.00100276	0.0514861	0.00629362	0.790046	0.790046	-0.000798513	-0.00801977	0.00642274		2451	4784502	0.0512279	3125	5961362	0.0524209	2957	5830473	0.0507163	2922	5829240	0.0501266	2754	5603916	0.0491442	2530	5010959	0.0504893	3103	5749760	0.0539675	3249	5762448	0.0563823	2747	5837442	0.0470583	1935	4873296	0.0397062	3900	7269910	0.0536458	2695	4634062	0.0581563
Ion channels	0.024215	0.00173756	0.0237349	0.00393279	0.810147	0.810147	0.000480028	-0.00408277	0.00504282		1128	4784502	0.0235761	1654	5961362	0.0277453	1441	5830473	0.024715	1366	5829240	0.0234336	1323	5603916	0.0236085	1113	5010959	0.0222113	1479	5749760	0.0257228	1562	5762448	0.0271065	1309	5837442	0.0224242	782	4873296	0.0160466	1695	7269910	0.0233153	1288	4634062	0.0277942
Isoflavonoid biosynthesis	0.000223486	9.30775e-05	0.000273372	0.000159965	0.563313	0.563313	-4.98852e-05	-0.000240592	0.000140822		6	4784502	0.000125405	20	5961362	0.000335494	13	5830473	0.000222966	8	5829240	0.000137239	9	5603916	0.000160602	18	5010959	0.000359213	21	5749760	0.000365233	30	5762448	0.000520612	18	5837442	0.000308354	9	4873296	0.00018468	19	7269910	0.000261351	0	4634062	0
Isoquinoline alkaloid biosynthesis	0.0779279	0.000939226	0.0805135	0.00490723	0.296102	0.296102	-0.00258562	-0.00821356	0.00304232		3702	4784502	0.0773748	4687	5961362	0.078623	4501	5830473	0.0771979	4569	5829240	0.0783807	4294	5603916	0.076625	3977	5010959	0.079366	4680	5749760	0.0813947	4818	5762448	0.0836103	4335	5837442	0.074262	3585	4873296	0.0735642	6083	7269910	0.0836737	4012	4634062	0.0865763
Leishmaniasis	1.99563e-05	4.46236e-05	2.29255e-06	5.12631e-06	0.418483	0.418483	1.76637e-05	-3.35761e-05	6.89035e-05		0	4784502	0	0	5961362	0	0	5830473	0	0	5829240	0	0	5603916	0	6	5010959	0.000119738	0	5749760	0	0	5762448	0	0	5837442	0	0	4873296	0	1	7269910	1.37553e-05	0	4634062	0
Leukocyte transendothelial migration	0	0	0	0	1	1	0	0	0	degenerate case: variance of both groups is zero	0	4784502	0	0	5961362	0	0	5830473	0	0	5829240	0	0	5603916	0	0	5010959	0	0	5749760	0	0	5762448	0	0	5837442	0	0	4873296	0	0	7269910	0	0	4634062	0
Limonene and pinene degradation	0.564228	0.0311704	0.604769	0.0792713	0.325087	0.325087	-0.040541	-0.13201	0.0509281		27201	4784502	0.568523	30445	5961362	0.510705	33293	5830473	0.571017	31617	5829240	0.542386	34169	5603916	0.609734	29214	5010959	0.583002	33840	5749760	0.588546	31412	5762448	0.545116	39891	5837442	0.683364	34764	4873296	0.713357	44988	7269910	0.618825	22216	4634062	0.479407
Linoleic acid metabolism	0.120742	0.00911082	0.146829	0.0168399	0.0166499	0.0166499	-0.0260874	-0.0459693	-0.00620549		5209	4784502	0.108872	6524	5961362	0.109438	7263	5830473	0.12457	7168	5829240	0.122966	6931	5603916	0.123681	6761	5010959	0.134924	7879	5749760	0.137032	7542	5762448	0.130882	9101	5837442	0.155907	8519	4873296	0.17481	11319	7269910	0.155697	5869	4634062	0.126649
Lipid biosynthesis proteins	0.870697	0.0121385	0.859832	0.0140026	0.219753	0.219753	0.0108645	-0.00765173	0.0293808		42241	4784502	0.882871	51318	5961362	0.860844	50909	5830473	0.873154	49895	5829240	0.855943	49830	5603916	0.8892	43203	5010959	0.86217	49963	5749760	0.868958	49515	5762448	0.85927	50902	5837442	0.871992	41787	4873296	0.857469	63269	7269910	0.870286	38510	4634062	0.83102
Lipid metabolism	0.135221	0.00273659	0.1418	0.0010497	0.00195812	0.00195812	-0.0065791	-0.00973408	-0.00342412		6293	4784502	0.131529	8107	5961362	0.135992	7998	5830473	0.137176	7832	5829240	0.134357	7433	5603916	0.132639	6997	5010959	0.139634	8098	5749760	0.140841	8173	5762448	0.141832	8300	5837442	0.142186	6837	4873296	0.140295	10439	7269910	0.143592	6583	4634062	0.142057
Lipoic acid metabolism	0.0534336	0.00181293	0.0493233	0.00264687	0.0189607	0.0189607	0.00411021	0.000855878	0.00736454		2661	4784502	0.0556171	3303	5961362	0.0554068	3082	5830473	0.0528602	3149	5829240	0.0540208	2929	5603916	0.052267	2527	5010959	0.0504295	2902	5749760	0.0504717	2956	5762448	0.0512976	2691	5837442	0.046099	2240	4873296	0.0459648	3556	7269910	0.0489139	2465	4634062	0.0531931
Lipopolysaccharide biosynthesis	0.372965	0.0113115	0.36155	0.0479982	0.624697	0.624697	0.0114148	-0.043617	0.0664465		18184	4784502	0.38006	23254	5961362	0.390079	21083	5830473	0.3616	22229	5829240	0.381336	20290	5603916	0.362068	18172	5010959	0.362645	21824	5749760	0.379564	22943	5762448	0.398147	18215	5837442	0.312037	14196	4873296	0.291302	26006	7269910	0.357721	19951	4634062	0.430529
Lipopolysaccharide biosynthesis proteins	0.438784	0.0118308	0.429636	0.0539693	0.725091	0.725091	0.00914817	-0.0527324	0.0710288		21001	4784502	0.438938	27367	5961362	0.459073	24792	5830473	0.425214	26073	5829240	0.44728	23868	5603916	0.425916	21862	5010959	0.436284	25893	5749760	0.450332	27108	5762448	0.470425	21918	5837442	0.375473	16915	4873296	0.347096	31244	7269910	0.429771	23389	4634062	0.504719
Long-term depression	0	0	0	0	1	1	0	0	0	degenerate case: variance of both groups is zero	0	4784502	0	0	5961362	0	0	5830473	0	0	5829240	0	0	5603916	0	0	5010959	0	0	5749760	0	0	5762448	0	0	5837442	0	0	4873296	0	0	7269910	0	0	4634062	0
Long-term potentiation	0	0	0	0	1	1	0	0	0	degenerate case: variance of both groups is zero	0	4784502	0	0	5961362	0	0	5830473	0	0	5829240	0	0	5603916	0	0	5010959	0	0	5749760	0	0	5762448	0	0	5837442	0	0	4873296	0	0	7269910	0	0	4634062	0
Lysine biosynthesis	0.540723	0.00830752	0.522739	0.019686	0.10358	0.10358	0.0179835	-0.00479994	0.0407668		26521	4784502	0.554311	32597	5961362	0.546805	31260	5830473	0.536149	31573	5829240	0.541631	30112	5603916	0.537339	26463	5010959	0.528103	30470	5749760	0.529935	31102	5762448	0.539736	29316	5837442	0.502206	24091	4873296	0.494347	37810	7269910	0.520089	25493	4634062	0.550122
Lysine degradation	0.614498	0.0235071	0.62197	0.0642109	0.814701	0.814701	-0.00747233	-0.0813987	0.066454		30000	4784502	0.627025	34346	5961362	0.576144	36122	5830473	0.619538	34768	5829240	0.596441	36480	5603916	0.650973	30911	5010959	0.616868	35307	5749760	0.61406	33133	5762448	0.574981	40145	5837442	0.687716	34765	4873296	0.713378	44972	7269910	0.618605	24240	4634062	0.523083
Lysosome	0.0728592	0.00536572	0.0602882	0.0240757	0.301679	0.301679	0.012571	-0.0150335	0.0401755		3741	4784502	0.07819	4854	5961362	0.0814243	4092	5830473	0.070183	4241	5829240	0.0727539	3828	5603916	0.0683094	3322	5010959	0.0662947	4071	5749760	0.070803	4598	5762448	0.0797925	2047	5837442	0.0350667	1124	4873296	0.0230645	4484	7269910	0.0616789	4232	4634062	0.0913238
MAPK signaling pathway	0	0	0	0	1	1	0	0	0	degenerate case: variance of both groups is zero	0	4784502	0	0	5961362	0	0	5830473	0	0	5829240	0	0	5603916	0	0	5010959	0	0	5749760	0	0	5762448	0	0	5837442	0	0	4873296	0	0	7269910	0	0	4634062	0
MAPK signaling pathway - yeast	0.0258826	0.000878671	0.029118	0.00231561	0.0246416	0.0246416	-0.00323542	-0.00590414	-0.000566709		1176	4784502	0.0245794	1544	5961362	0.0259001	1551	5830473	0.0266016	1448	5829240	0.0248403	1488	5603916	0.0265529	1344	5010959	0.0268212	1643	5749760	0.0285751	1585	5762448	0.0275057	1851	5837442	0.0317091	1568	4873296	0.0321753	2127	7269910	0.0292576	1181	4634062	0.0254852
Measles	0	0	0	0	1	1	0	0	0	degenerate case: variance of both groups is zero	0	4784502	0	0	5961362	0	0	5830473	0	0	5829240	0	0	5603916	0	0	5010959	0	0	5749760	0	0	5762448	0	0	5837442	0	0	4873296	0	0	7269910	0	0	4634062	0
Meiosis - yeast	0.122773	0.00705719	0.146493	0.0182996	0.0329171	0.0329171	-0.0237206	-0.0448218	-0.00261941		5192	4784502	0.108517	7202	5961362	0.120811	7644	5830473	0.131104	7251	5829240	0.12439	7067	5603916	0.126108	6299	5010959	0.125704	8279	5749760	0.143989	7703	5762448	0.133676	10036	5837442	0.171925	8195	4873296	0.168161	10253	7269910	0.141033	5569	4634062	0.120175
Melanogenesis	0.000514588	0.000386869	0.00138854	0.000968499	0.105946	0.105946	-0.00087395	-0.00199214	0.000244241		18	4784502	0.000376215	13	5961362	0.000218071	29	5830473	0.000497387	28	5829240	0.000480337	10	5603916	0.000178447	67	5010959	0.00133707	65	5749760	0.00113048	106	5762448	0.0018395	26	5837442	0.000445401	7	4873296	0.00014364	223	7269910	0.00306744	79	4634062	0.00170477
Membrane and intracellular structural molecules	0.718504	0.0119108	0.720634	0.0261257	0.87296	0.87296	-0.00212978	-0.0324999	0.0282404		34812	4784502	0.727599	43711	5961362	0.733238	41297	5830473	0.708296	42454	5829240	0.728294	39260	5603916	0.700582	35729	5010959	0.713017	41853	5749760	0.727909	42499	5762448	0.737516	40114	5837442	0.687185	33696	4873296	0.691442	52126	7269910	0.71701	35346	4634062	0.762743
Metabolism of cofactors and vitamins	0.221659	0.00392894	0.231298	0.00747056	0.0355267	0.0355267	-0.00963975	-0.0184314	-0.000848066		10531	4784502	0.220107	12861	5961362	0.215739	12810	5830473	0.219708	13072	5829240	0.224249	12430	5603916	0.221809	11442	5010959	0.22834	12952	5749760	0.225262	12910	5762448	0.224037	13373	5837442	0.22909	12020	4873296	0.24665	16937	7269910	0.232974	10648	4634062	0.229777
Metabolism of xenobiotics by cytochrome P450	0.324254	0.0188051	0.368154	0.0506522	0.116414	0.116414	-0.0438993	-0.102238	0.0144392		14539	4784502	0.303877	17641	5961362	0.295922	19194	5830473	0.329201	19264	5829240	0.330472	18761	5603916	0.334784	17602	5010959	0.35127	19819	5749760	0.344693	18565	5762448	0.322172	23588	5837442	0.404081	22097	4873296	0.45343	27616	7269910	0.379867	14119	4634062	0.304679
Methane metabolism	0.958958	0.0138896	0.993034	0.042553	0.139173	0.139173	-0.0340758	-0.0829544	0.0148028		45148	4784502	0.94363	56052	5961362	0.940255	56674	5830473	0.972031	55565	5829240	0.953212	54349	5603916	0.96984	48846	5010959	0.974783	55883	5749760	0.971919	55105	5762448	0.956278	60595	5837442	1.03804	51202	4873296	1.05066	73246	7269910	1.00752	43272	4634062	0.933781
Mineral absorption	0.00719687	0.000544859	0.00856427	0.00136924	0.0794466	0.0794466	-0.0013674	-0.00294804	0.000213239		293	4784502	0.00612394	452	5961362	0.00758216	426	5830473	0.00730644	455	5829240	0.00780548	390	5603916	0.00695942	371	5010959	0.00740377	433	5749760	0.00753075	411	5762448	0.00713239	571	5837442	0.00978168	532	4873296	0.0109166	619	7269910	0.00851455	348	4634062	0.00750961
Mismatch repair	0.500263	0.0125567	0.47855	0.0285597	0.164461	0.164461	0.0217125	-0.0114129	0.0548379		24789	4784502	0.51811	30642	5961362	0.51401	28814	5830473	0.494197	29207	5829240	0.501043	27591	5603916	0.492352	24146	5010959	0.481864	28183	5749760	0.49016	29031	5762448	0.503796	26262	5837442	0.449889	21319	4873296	0.437466	34303	7269910	0.471849	24011	4634062	0.518142
mRNA surveillance pathway	0.000491826	0.000238396	6.07221e-05	8.10047e-05	0.00830212	0.00830212	0.000431104	0.000157089	0.000705118		44	4784502	0.000919636	18	5961362	0.000301944	34	5830473	0.000583143	14	5829240	0.000240169	34	5603916	0.000606719	15	5010959	0.000299344	0	5749760	0	0	5762448	0	0	5837442	0	10	4873296	0.0002052	10	7269910	0.000137553	1	4634062	2.15793e-05
mTOR signaling pathway	0	0	0	0	1	1	0	0	0	degenerate case: variance of both groups is zero	0	4784502	0	0	5961362	0	0	5830473	0	0	5829240	0	0	5603916	0	0	5010959	0	0	5749760	0	0	5762448	0	0	5837442	0	0	4873296	0	0	7269910	0	0	4634062	0
N-Glycan biosynthesis	0.0336421	0.000824122	0.034207	0.00202328	0.58227	0.58227	-0.00056491	-0.00290276	0.00177294		1560	4784502	0.0326053	2073	5961362	0.0347739	1900	5830473	0.0325874	1970	5829240	0.0337951	1928	5603916	0.0344045	1688	5010959	0.0336862	2067	5749760	0.0359493	2047	5762448	0.0355231	1909	5837442	0.0327027	1504	4873296	0.0308621	2440	7269910	0.033563	1698	4634062	0.0366417
Naphthalene degradation	0.386533	0.0186006	0.419255	0.0461936	0.187871	0.187871	-0.0327221	-0.0860723	0.0206282		18590	4784502	0.388546	21022	5961362	0.352638	22599	5830473	0.387601	22025	5829240	0.377837	23089	5603916	0.412015	20072	5010959	0.400562	23436	5749760	0.4076	22127	5762448	0.383986	26871	5837442	0.460321	23707	4873296	0.486467	31219	7269910	0.429428	16114	4634062	0.347729
Neuroactive ligand-receptor interaction	0.000216246	7.45052e-05	0.000185518	0.000128687	0.656312	0.656312	3.07283e-05	-0.000122577	0.000184033		8	4784502	0.000167207	15	5961362	0.00025162	11	5830473	0.000188664	12	5829240	0.000205859	7	5603916	0.000124913	18	5010959	0.000359213	0	5749760	0	7	5762448	0.000121476	11	5837442	0.000188439	11	4873296	0.00022572	31	7269910	0.000426415	7	4634062	0.000151055
Neurotrophin signaling pathway	0	0	0	0	1	1	0	0	0	degenerate case: variance of both groups is zero	0	4784502	0	0	5961362	0	0	5830473	0	0	5829240	0	0	5603916	0	0	5010959	0	0	5749760	0	0	5762448	0	0	5837442	0	0	4873296	0	0	7269910	0	0	4634062	0
Nicotinate and nicotinamide metabolism	0.352711	0.00375692	0.344725	0.00630911	0.0405454	0.0405454	0.007986	0.000437532	0.0155345		17096	4784502	0.35732	21317	5961362	0.357586	20425	5830473	0.350315	20590	5829240	0.353219	19640	5603916	0.350469	17406	5010959	0.347359	19972	5749760	0.347354	20108	5762448	0.348949	19614	5837442	0.336003	16430	4873296	0.337143	25097	7269910	0.345217	16390	4634062	0.353685
Nitrogen metabolism	0.778559	0.00666998	0.804638	0.0102272	0.00114237	0.00114237	-0.0260791	-0.0385193	-0.013639		36678	4784502	0.7666	46593	5961362	0.781583	45141	5830473	0.774225	45446	5829240	0.779621	43793	5603916	0.781471	39479	5010959	0.787853	46690	5749760	0.812034	46265	5762448	0.802871	48014	5837442	0.822518	38759	4873296	0.795334	58387	7269910	0.803132	36699	4634062	0.79194
Nitrotoluene degradation	0.152507	0.00838934	0.168108	0.0128769	0.0506933	0.0506933	-0.015601	-0.031261	5.89225e-05		6674	4784502	0.139492	8555	5961362	0.143507	9147	5830473	0.156883	9094	5829240	0.156007	8690	5603916	0.15507	8222	5010959	0.16408	9246	5749760	0.160807	8992	5762448	0.156045	10490	5837442	0.179702	9125	4873296	0.187245	12589	7269910	0.173166	7029	4634062	0.151681
NOD-like receptor signaling pathway	0.00975413	0.00104398	0.012526	0.00120711	0.00316071	0.00316071	-0.00277183	-0.0043666	-0.00117706		383	4784502	0.00800501	580	5961362	0.00972932	595	5830473	0.010205	554	5829240	0.00950381	535	5603916	0.0095469	578	5010959	0.0115347	691	5749760	0.0120179	695	5762448	0.0120608	751	5837442	0.0128652	639	4873296	0.0131123	1056	7269910	0.0145256	490	4634062	0.0105739
Non-homologous end-joining	0.104958	0.00250687	0.102022	0.00699907	0.409885	0.409885	0.00293557	-0.00511809	0.0109892		5231	4784502	0.109332	6348	5961362	0.106486	6069	5830473	0.104091	6026	5829240	0.103375	5890	5603916	0.105105	5079	5010959	0.101358	6183	5749760	0.107535	6256	5762448	0.108565	5699	5837442	0.0976284	4343	4873296	0.0891183	7371	7269910	0.101391	5000	4634062	0.107897
Notch signaling pathway	0.000101652	0.000144835	5.79734e-05	0.000129633	0.626343	0.626343	4.36789e-05	-0.000150328	0.000237686		0	4784502	0	20	5961362	0.000335494	16	5830473	0.00027442	0	5829240	0	0	5603916	0	0	5010959	0	20	5749760	0.000347841	0	5762448	0	0	5837442	0	0	4873296	0	0	7269910	0	0	4634062	0
Novobiocin biosynthesis	0.106329	0.0017746	0.103609	0.00791942	0.484355	0.484355	0.00272035	-0.00635977	0.0118005		5184	4784502	0.10835	6497	5961362	0.108985	6089	5830473	0.104434	6153	5829240	0.105554	5853	5603916	0.104445	5322	5010959	0.106207	6101	5749760	0.106109	6316	5762448	0.109606	5563	5837442	0.0952986	4430	4873296	0.0909036	7729	7269910	0.106315	5256	4634062	0.113421
Nucleotide excision repair	0.302858	0.00786834	0.289988	0.0212873	0.249336	0.249336	0.0128704	-0.0116441	0.037385		15046	4784502	0.314474	18552	5961362	0.311204	17468	5830473	0.299598	17564	5829240	0.301309	16795	5603916	0.299701	14575	5010959	0.290862	17271	5749760	0.300378	17852	5762448	0.309799	15847	5837442	0.271472	12406	4873296	0.254571	20997	7269910	0.288821	14592	4634062	0.314886
Nucleotide metabolism	0.0026572	0.00171912	0.00204829	0.000780878	0.494282	0.494282	0.000608915	-0.00138902	0.00260685		93	4784502	0.00194378	141	5961362	0.00236523	107	5830473	0.00183519	80	5829240	0.00137239	111	5603916	0.00198076	323	5010959	0.00644587	94	5749760	0.00163485	184	5762448	0.00319309	161	5837442	0.00275806	37	4873296	0.00075924	144	7269910	0.00198077	91	4634062	0.00196372
Olfactory transduction	0	0	0	0	1	1	0	0	0	degenerate case: variance of both groups is zero	0	4784502	0	0	5961362	0	0	5830473	0	0	5829240	0	0	5603916	0	0	5010959	0	0	5749760	0	0	5762448	0	0	5837442	0	0	4873296	0	0	7269910	0	0	4634062	0
One carbon pool by folate	0.374208	0.00835853	0.352471	0.0124248	0.0104369	0.0104369	0.0217361	0.0065222	0.03695		18506	4784502	0.386791	22703	5961362	0.380836	21555	5830473	0.369696	21926	5829240	0.376138	20797	5603916	0.371115	18073	5010959	0.360669	20584	5749760	0.357998	20955	5762448	0.363648	19812	5837442	0.339395	16494	4873296	0.338457	25041	7269910	0.344447	17187	4634062	0.370884
Oocyte meiosis	0	0	0	0	1	1	0	0	0	degenerate case: variance of both groups is zero	0	4784502	0	0	5961362	0	0	5830473	0	0	5829240	0	0	5603916	0	0	5010959	0	0	5749760	0	0	5762448	0	0	5837442	0	0	4873296	0	0	7269910	0	0	4634062	0
Other glycan degradation	0.134691	0.00889182	0.118783	0.0490171	0.505234	0.505234	0.0159089	-0.0403144	0.0721321		6874	4784502	0.143672	8868	5961362	0.148758	7439	5830473	0.127588	7907	5829240	0.135644	7022	5603916	0.125305	6373	5010959	0.127181	7782	5749760	0.135345	9126	5762448	0.15837	4062	5837442	0.0695853	2009	4873296	0.0412247	9116	7269910	0.125394	8470	4634062	0.182777
Other ion-coupled transporters	0.812068	0.0112383	0.791525	0.0192269	0.0727987	0.0727987	0.0205435	-0.00239407	0.043481		39111	4784502	0.817452	48802	5961362	0.818638	46679	5830473	0.800604	47317	5829240	0.811718	44571	5603916	0.795355	41523	5010959	0.828644	45701	5749760	0.794833	46345	5762448	0.804259	45100	5837442	0.772599	37119	4873296	0.761682	57903	7269910	0.796475	37967	4634062	0.819303
Other transporters	0.20422	0.00535733	0.212476	0.0054519	0.0363706	0.0363706	-0.00825563	-0.0158724	-0.000638848		9421	4784502	0.196907	12190	5961362	0.204483	11892	5830473	0.203963	12004	5829240	0.205927	11205	5603916	0.199949	10728	5010959	0.214091	12077	5749760	0.210044	12348	5762448	0.214284	12008	5837442	0.205707	10127	4873296	0.207806	16161	7269910	0.2223	9950	4634062	0.214714
Other types of O-glycan biosynthesis	0	0	0	0	1	1	0	0	0	degenerate case: variance of both groups is zero	0	4784502	0	0	5961362	0	0	5830473	0	0	5829240	0	0	5603916	0	0	5010959	0	0	5749760	0	0	5762448	0	0	5837442	0	0	4873296	0	0	7269910	0	0	4634062	0
Others	1.13471	0.0329462	1.23532	0.0286821	0.000457839	0.000457839	-0.100613	-0.144252	-0.0569739		52732	4784502	1.10214	65545	5961362	1.0995	65466	5830473	1.12282	65734	5829240	1.12766	65376	5603916	1.16661	59606	5010959	1.18951	70747	5749760	1.23043	69838	5762448	1.21195	72699	5837442	1.24539	61468	4873296	1.26132	92589	7269910	1.27359	55110	4634062	1.18924
Oxidative phosphorylation	1.39322	0.0345373	1.33908	0.0695448	0.161083	0.161083	0.0541349	-0.0272453	0.135515		68755	4784502	1.43704	85276	5961362	1.43048	80238	5830473	1.37618	81864	5829240	1.40437	76943	5603916	1.37302	67057	5010959	1.33821	78340	5749760	1.36249	80754	5762448	1.40138	74252	5837442	1.272	60657	4873296	1.24468	95419	7269910	1.31252	66796	4634062	1.44141
p53 signaling pathway	0.041431	0.00233356	0.0493759	0.00644124	0.0393225	0.0393225	-0.0079449	-0.0153587	-0.000531054		1804	4784502	0.0377051	2341	5961362	0.0392695	2438	5830473	0.0418148	2466	5829240	0.042304	2389	5603916	0.0426309	2248	5010959	0.0448617	2711	5749760	0.0471498	2486	5762448	0.0431414	3240	5837442	0.0555038	2882	4873296	0.0591386	3663	7269910	0.0503858	1897	4634062	0.040936
Pancreatic cancer	0	0	0	0	1	1	0	0	0	degenerate case: variance of both groups is zero	0	4784502	0	0	5961362	0	0	5830473	0	0	5829240	0	0	5603916	0	0	5010959	0	0	5749760	0	0	5762448	0	0	5837442	0	0	4873296	0	0	7269910	0	0	4634062	0
Pancreatic secretion	0.000216246	7.45052e-05	0.000185518	0.000128687	0.656312	0.656312	3.07283e-05	-0.000122577	0.000184033		8	4784502	0.000167207	15	5961362	0.00025162	11	5830473	0.000188664	12	5829240	0.000205859	7	5603916	0.000124913	18	5010959	0.000359213	0	5749760	0	7	5762448	0.000121476	11	5837442	0.000188439	11	4873296	0.00022572	31	7269910	0.000426415	7	4634062	0.000151055
Pantothenate and CoA biosynthesis	0.518377	0.00307713	0.514924	0.00569195	0.268304	0.268304	0.00345263	-0.00326692	0.0101722		24555	4784502	0.51322	31144	5961362	0.522431	30156	5830473	0.517214	30328	5829240	0.520274	29177	5603916	0.520654	25880	5010959	0.516468	29703	5749760	0.516595	29851	5762448	0.518026	30030	5837442	0.514438	24499	4873296	0.502719	37784	7269910	0.519731	24006	4634062	0.518034
Parkinson's disease	0.0879638	0.00204669	0.0969799	0.00950459	0.0880641	0.0880641	-0.00901608	-0.0199142	0.00188201		4070	4784502	0.0850663	5111	5961362	0.0857354	5124	5830473	0.0878831	5293	5829240	0.0908009	4958	5603916	0.0884738	4501	5010959	0.0898231	5352	5749760	0.0930821	5073	5762448	0.0880355	6082	5837442	0.104189	5559	4873296	0.114071	6947	7269910	0.0955583	4029	4634062	0.0869432
Pathogenic Escherichia coli infection	0	0	0	0	1	1	0	0	0	degenerate case: variance of both groups is zero	0	4784502	0	0	5961362	0	0	5830473	0	0	5829240	0	0	5603916	0	0	5010959	0	0	5749760	0	0	5762448	0	0	5837442	0	0	4873296	0	0	7269910	0	0	4634062	0
Pathways in cancer	0.0664549	0.00335973	0.0769912	0.00981188	0.0624162	0.0624162	-0.0105362	-0.0218157	0.000743243		2917	4784502	0.0609677	3804	5961362	0.0638109	3974	5830473	0.0681591	3885	5829240	0.0666468	3785	5603916	0.0675421	3588	5010959	0.0716031	4234	5749760	0.0736379	3938	5762448	0.068339	4988	5837442	0.0854484	4478	4873296	0.0918885	5779	7269910	0.079492	2926	4634062	0.0631411
Penicillin and cephalosporin biosynthesis	0.111689	0.00388491	0.106579	0.0144728	0.475992	0.475992	0.00511045	-0.0114866	0.0217075		5368	4784502	0.112196	7016	5961362	0.117691	6203	5830473	0.106389	6718	5829240	0.115247	6184	5603916	0.110351	5425	5010959	0.108263	6412	5749760	0.111518	6800	5762448	0.118005	5415	5837442	0.0927632	4123	4873296	0.0846039	7659	7269910	0.105352	5896	4634062	0.127232
Pentose and glucuronate interconversions	0.462505	0.00820275	0.432907	0.0478392	0.227829	0.227829	0.0295985	-0.0252815	0.0844784		22593	4784502	0.472212	28279	5961362	0.474371	26585	5830473	0.455966	26858	5829240	0.460746	25313	5603916	0.451702	23052	5010959	0.460032	25892	5749760	0.450314	27053	5762448	0.469471	22713	5837442	0.389092	17338	4873296	0.355776	31619	7269910	0.43493	23071	4634062	0.497857
Pentose phosphate pathway	0.665987	0.0077976	0.656661	0.0350932	0.584826	0.584826	0.00932648	-0.0309104	0.0495633		31942	4784502	0.667614	40530	5961362	0.679878	38458	5830473	0.659603	38931	5829240	0.667857	36695	5603916	0.65481	33381	5010959	0.66616	38240	5749760	0.665071	39248	5762448	0.681099	36198	5837442	0.6201	29448	4873296	0.604273	48099	7269910	0.661618	32800	4634062	0.707802
Peptidases	1.49216	0.0308396	1.43238	0.115229	0.307343	0.307343	0.0597795	-0.0723613	0.19192		72077	4784502	1.50647	92316	5961362	1.54857	85438	5830473	1.46537	87511	5829240	1.50124	82559	5603916	1.47324	73064	5010959	1.45808	84762	5749760	1.47418	87799	5762448	1.52364	77553	5837442	1.32854	60879	4873296	1.24924	103773	7269910	1.42743	73740	4634062	1.59126
Peptidoglycan biosynthesis	0.529256	0.0118491	0.500784	0.0262994	0.0633399	0.0633399	0.028472	-0.00207671	0.0590208		25967	4784502	0.542732	32411	5961362	0.543684	30833	5830473	0.528825	30923	5829240	0.530481	29103	5603916	0.519333	25580	5010959	0.510481	29168	5749760	0.507291	30131	5762448	0.522885	27630	5837442	0.473324	22788	4873296	0.46761	35752	7269910	0.491781	25108	4634062	0.541814
Peroxisome	0.317621	0.00528797	0.327788	0.013356	0.160586	0.160586	-0.010167	-0.025582	0.00524811		14815	4784502	0.309646	18609	5961362	0.31216	18663	5830473	0.320094	18476	5829240	0.316954	18141	5603916	0.32372	16193	5010959	0.323152	18679	5749760	0.324866	18294	5762448	0.317469	20148	5837442	0.345151	16569	4873296	0.339996	24227	7269910	0.33325	14180	4634062	0.305995
Pertussis	0.0471892	0.00420772	0.0542995	0.00294477	0.0128943	0.0128943	-0.00711034	-0.0123105	-0.0019102		2016	4784502	0.042136	2706	5961362	0.0453923	2698	5830473	0.0462741	2781	5829240	0.0477078	2567	5603916	0.0458073	2797	5010959	0.0558177	2972	5749760	0.0516891	3013	5762448	0.0522868	3408	5837442	0.0583817	2799	4873296	0.0574355	4026	7269910	0.055379	2346	4634062	0.0506251
Phagosome	0	0	0	0	1	1	0	0	0	degenerate case: variance of both groups is zero	0	4784502	0	0	5961362	0	0	5830473	0	0	5829240	0	0	5603916	0	0	5010959	0	0	5749760	0	0	5762448	0	0	5837442	0	0	4873296	0	0	7269910	0	0	4634062	0
Phenylalanine metabolism	0.461572	0.00777337	0.469034	0.0111296	0.25038	0.25038	-0.00746239	-0.0212102	0.00628542		21598	4784502	0.451416	27024	5961362	0.453319	27147	5830473	0.465605	26744	5829240	0.458791	26169	5603916	0.466977	23718	5010959	0.473323	26703	5749760	0.464419	26499	5762448	0.459857	27852	5837442	0.477127	23409	4873296	0.480353	34958	7269910	0.480859	20927	4634062	0.451591
Phenylpropanoid biosynthesis	0.145698	0.00501391	0.124604	0.0253682	0.123509	0.123509	0.0210939	-0.00799794	0.0501858		7339	4784502	0.153391	9017	5961362	0.151257	8303	5830473	0.142407	8492	5829240	0.145679	7859	5603916	0.140241	7076	5010959	0.14121	7666	5749760	0.133327	8421	5762448	0.146136	5790	5837442	0.0991873	4146	4873296	0.0850759	9157	7269910	0.125958	7319	4634062	0.157939
Phosphatidylinositol signaling system	0.0874403	0.00162284	0.0880232	0.0041816	0.780464	0.780464	-0.000582882	-0.00540569	0.00423992		4283	4784502	0.0895182	5235	5961362	0.0878155	5197	5830473	0.0891351	5095	5829240	0.0874042	4790	5603916	0.0854759	4274	5010959	0.0852931	4993	5749760	0.0868384	4900	5762448	0.0850333	5334	5837442	0.0913756	4663	4873296	0.0956847	6208	7269910	0.0853931	3884	4634062	0.0838142
Phosphonate and phosphinate metabolism	0.0635003	0.00388808	0.0711865	0.0100899	0.159596	0.159596	-0.00768616	-0.0193204	0.0039481		2732	4784502	0.057101	3597	5961362	0.0603386	3751	5830473	0.0643344	3780	5829240	0.0648455	3640	5603916	0.0649546	3479	5010959	0.0694278	3852	5749760	0.0669941	3559	5762448	0.0617619	4661	5837442	0.0798466	4256	4873296	0.0873331	5298	7269910	0.0728757	2702	4634062	0.0583074
Phosphotransferase system (PTS)	0.0594539	0.0146151	0.0576808	0.0106632	0.83134	0.83134	0.00177314	-0.0164845	0.0200308		2460	4784502	0.051416	3273	5961362	0.0549036	3121	5830473	0.0535291	3028	5829240	0.051945	2964	5603916	0.0528916	4612	5010959	0.0920383	2963	5749760	0.0515326	2842	5762448	0.0493193	4259	5837442	0.07296	3462	4873296	0.0710402	4087	7269910	0.056218	2086	4634062	0.0450145
Photosynthesis	0.2485	0.00919662	0.230309	0.0203156	0.111107	0.111107	0.0181915	-0.00541379	0.0417967		12490	4784502	0.261051	15163	5961362	0.254355	14412	5830473	0.247184	14742	5829240	0.252897	13640	5603916	0.243401	11631	5010959	0.232111	13536	5749760	0.235419	14225	5762448	0.246857	12193	5837442	0.208876	9928	4873296	0.203722	16378	7269910	0.225285	12127	4634062	0.261693
Photosynthesis - antenna proteins	9.72111e-05	0.000217371	0	0	0.363217	0.363217	9.72111e-05	-0.000152678	0.0003471		0	4784502	0	0	5961362	0	0	5830473	0	34	5829240	0.000583266	0	5603916	0	0	5010959	0	0	5749760	0	0	5762448	0	0	5837442	0	0	4873296	0	0	7269910	0	0	4634062	0
Photosynthesis proteins	0.27481	0.00710914	0.266067	0.0147561	0.270503	0.270503	0.00874237	-0.00848039	0.0259651		13598	4784502	0.284209	16559	5961362	0.277772	15989	5830473	0.274232	16314	5829240	0.279865	15174	5603916	0.270775	13129	5010959	0.262006	15538	5749760	0.270237	16121	5762448	0.27976	14725	5837442	0.252251	12046	4873296	0.247184	18799	7269910	0.258586	13364	4634062	0.288386
Phototransduction	0	0	0	0	1	1	0	0	0	degenerate case: variance of both groups is zero	0	4784502	0	0	5961362	0	0	5830473	0	0	5829240	0	0	5603916	0	0	5010959	0	0	5749760	0	0	5762448	0	0	5837442	0	0	4873296	0	0	7269910	0	0	4634062	0
Phototransduction - fly	0	0	0	0	1	1	0	0	0	degenerate case: variance of both groups is zero	0	4784502	0	0	5961362	0	0	5830473	0	0	5829240	0	0	5603916	0	0	5010959	0	0	5749760	0	0	5762448	0	0	5837442	0	0	4873296	0	0	7269910	0	0	4634062	0
Plant-pathogen interaction	0.113112	0.00185495	0.104564	0.00471848	0.00798627	0.00798627	0.00854806	0.00310356	0.0139926		5537	4784502	0.115728	6832	5961362	0.114605	6543	5830473	0.112221	6627	5829240	0.113685	6304	5603916	0.112493	5509	5010959	0.109939	6014	5749760	0.104596	6183	5762448	0.107298	5642	5837442	0.0966519	4936	4873296	0.101287	7694	7269910	0.105833	5177	4634062	0.111716
Polycyclic aromatic hydrocarbon degradation	0.223203	0.0137073	0.250205	0.0290905	0.101845	0.101845	-0.0270025	-0.0608974	0.00689246		10816	4784502	0.226063	12018	5961362	0.201598	13124	5830473	0.225093	12298	5829240	0.210971	13669	5603916	0.243919	11604	5010959	0.231572	14269	5749760	0.248167	13350	5762448	0.231672	16512	5837442	0.282864	13698	4873296	0.281083	18801	7269910	0.258614	9214	4634062	0.198832
Polyketide sugar unit biosynthesis	0.135911	0.0028773	0.134128	0.00913949	0.691848	0.691848	0.00178305	-0.00871001	0.0122761		6593	4784502	0.137799	8365	5961362	0.14032	7992	5830473	0.137073	7868	5829240	0.134975	7504	5603916	0.133906	6584	5010959	0.131392	7862	5749760	0.136736	8179	5762448	0.141936	7317	5837442	0.125346	5876	4873296	0.120575	9666	7269910	0.132959	6822	4634062	0.147214
Pores ion channels	0.509462	0.00837364	0.517707	0.0137585	0.284449	0.284449	-0.00824486	-0.0247653	0.0082756		24391	4784502	0.509792	30807	5961362	0.516778	29427	5830473	0.50471	30087	5829240	0.516139	27650	5603916	0.493405	25854	5010959	0.515949	29659	5749760	0.51583	30366	5762448	0.526964	29051	5837442	0.497667	24517	4873296	0.503089	38233	7269910	0.525907	24875	4634062	0.536786
Porphyrin and chlorophyll metabolism	0.848542	0.00724523	0.872452	0.0360443	0.201408	0.201408	-0.0239093	-0.065243	0.0174245		40824	4784502	0.853255	49731	5961362	0.834222	49751	5830473	0.853293	49912	5829240	0.856235	47527	5603916	0.848103	42400	5010959	0.846145	49170	5749760	0.855166	49039	5762448	0.85101	53024	5837442	0.908343	45515	4873296	0.933967	62094	7269910	0.854123	38560	4634062	0.832099
PPAR signaling pathway	0.238683	0.00567234	0.230059	0.00757313	0.07109	0.07109	0.00862405	-0.000906361	0.0181545		11586	4784502	0.242157	13886	5961362	0.232933	14190	5830473	0.243376	13485	5829240	0.231334	13820	5603916	0.246613	11810	5010959	0.235683	13324	5749760	0.231731	13047	5762448	0.226414	13893	5837442	0.237998	11350	4873296	0.232902	17164	7269910	0.236096	9973	4634062	0.215211
Prenyltransferases	0.288739	0.0051617	0.283902	0.011376	0.415391	0.415391	0.00483689	-0.00838313	0.0180569		14199	4784502	0.296771	17481	5961362	0.293238	16506	5830473	0.283099	16917	5829240	0.290209	16045	5603916	0.286318	14171	5010959	0.2828	16461	5749760	0.28629	17011	5762448	0.295204	15793	5837442	0.270547	13090	4873296	0.268607	20623	7269910	0.283676	13860	4634062	0.29909
Primary bile acid biosynthesis	0.0166721	0.001604	0.0176079	0.00285175	0.540644	0.540644	-0.000935747	-0.00431926	0.00244776		791	4784502	0.0165325	851	5961362	0.0142753	993	5830473	0.0170312	886	5829240	0.0151992	1070	5603916	0.0190938	897	5010959	0.0179008	969	5749760	0.0168529	898	5762448	0.0155837	1200	5837442	0.0205569	999	4873296	0.0204995	1412	7269910	0.0194225	590	4634062	0.0127318
Primary immunodeficiency	0.0374757	0.00249965	0.0304306	0.00568062	0.0393854	0.0393854	0.00704511	0.000456047	0.0136342		1983	4784502	0.0414463	2381	5961362	0.0399405	2179	5830473	0.0373726	2126	5829240	0.0364713	1977	5603916	0.0352789	1721	5010959	0.0343447	1832	5749760	0.0318622	2027	5762448	0.035176	1461	5837442	0.0250281	1047	4873296	0.0214844	2245	7269910	0.0308807	1768	4634062	0.0381523
Prion diseases	0.0057212	0.000830118	0.00626494	0.00198483	0.590403	0.590403	-0.000543738	-0.00283987	0.00175239		311	4784502	0.00650015	335	5961362	0.00561952	306	5830473	0.00524829	244	5829240	0.00418579	349	5603916	0.00622779	328	5010959	0.00654565	412	5749760	0.00716552	421	5762448	0.00730592	303	5837442	0.00519063	114	4873296	0.00233928	603	7269910	0.00829446	338	4634062	0.00729382
Progesterone-mediated oocyte maturation	0.00975413	0.00104398	0.0125201	0.00120915	0.00322518	0.00322518	-0.00276594	-0.00436236	-0.00116952		383	4784502	0.00800501	580	5961362	0.00972932	595	5830473	0.010205	554	5829240	0.00950381	535	5603916	0.0095469	578	5010959	0.0115347	691	5749760	0.0120179	695	5762448	0.0120608	751	5837442	0.0128652	639	4873296	0.0131123	1055	7269910	0.0145119	489	4634062	0.0105523
Propanoate metabolism	1.14147	0.0298103	1.14669	0.0732317	0.887072	0.887072	-0.00521841	-0.0898336	0.0793968		55513	4784502	1.16027	65106	5961362	1.09213	67037	5830473	1.14977	65236	5829240	1.11912	66458	5603916	1.18592	57207	5010959	1.14164	65381	5749760	1.13711	63008	5762448	1.09342	71376	5837442	1.22273	60893	4873296	1.24952	83182	7269910	1.1442	47878	4634062	1.03318
Prostate cancer	0.00975413	0.00104398	0.0125201	0.00120915	0.00322518	0.00322518	-0.00276594	-0.00436236	-0.00116952		383	4784502	0.00800501	580	5961362	0.00972932	595	5830473	0.010205	554	5829240	0.00950381	535	5603916	0.0095469	578	5010959	0.0115347	691	5749760	0.0120179	695	5762448	0.0120608	751	5837442	0.0128652	639	4873296	0.0131123	1055	7269910	0.0145119	489	4634062	0.0105523
Proteasome	0.0180851	0.000949687	0.0175542	0.00264312	0.686647	0.686647	0.00053089	-0.00251071	0.00357249		863	4784502	0.0180374	1084	5961362	0.0181838	1102	5830473	0.0189007	938	5829240	0.0160913	1059	5603916	0.0188975	922	5010959	0.0183997	1047	5749760	0.0182095	943	5762448	0.0163646	1155	5837442	0.0197861	891	4873296	0.0182833	1477	7269910	0.0203166	573	4634062	0.012365
Protein digestion and absorption	0.0133086	0.000863977	0.0098866	0.00344141	0.0774401	0.0774401	0.00342205	-0.000523837	0.00736793		692	4784502	0.0144634	849	5961362	0.0142417	719	5830473	0.0123318	795	5829240	0.0136381	722	5603916	0.0128838	616	5010959	0.0122931	597	5749760	0.010383	741	5762448	0.0128591	385	5837442	0.00659535	216	4873296	0.00443232	770	7269910	0.0105916	670	4634062	0.0144582
Protein export	0.441581	0.0113775	0.419956	0.0274929	0.150316	0.150316	0.0216249	-0.0101646	0.0534143		21923	4784502	0.458209	27012	5961362	0.453118	25272	5830473	0.433447	25885	5829240	0.444054	24371	5603916	0.434892	21335	5010959	0.425767	24645	5749760	0.428627	25518	5762448	0.442833	22811	5837442	0.39077	18588	4873296	0.381426	30264	7269910	0.416291	21307	4634062	0.459791
Protein folding and associated processing	0.758123	0.00322813	0.766387	0.00994447	0.127229	0.127229	-0.00826414	-0.019686	0.00315768		36189	4784502	0.75638	45372	5961362	0.761101	43925	5830473	0.753369	44489	5829240	0.763204	42480	5603916	0.758041	37915	5010959	0.756642	44073	5749760	0.766519	43927	5762448	0.762298	45063	5837442	0.771965	38198	4873296	0.783823	54625	7269910	0.751385	35327	4634062	0.762333
Protein kinases	0.349381	0.00663677	0.336009	0.0205758	0.215686	0.215686	0.0133722	-0.0102582	0.0370027		17130	4784502	0.358031	21376	5961362	0.358576	20005	5830473	0.343111	20220	5829240	0.346872	19494	5603916	0.347864	17129	5010959	0.341831	19675	5749760	0.342188	20391	5762448	0.35386	18509	5837442	0.317074	14905	4873296	0.30585	24078	7269910	0.331201	16955	4634062	0.365878
Protein processing in endoplasmic reticulum	0.0480275	0.000745019	0.0529498	0.00143898	0.000186731	0.000186731	-0.00492233	-0.00661298	-0.00323168		2265	4784502	0.0473404	2901	5961362	0.0486634	2856	5830473	0.048984	2778	5829240	0.0476563	2632	5603916	0.0469672	2433	5010959	0.0485536	3005	5749760	0.0522631	3013	5762448	0.0522868	3140	5837442	0.0537907	2686	4873296	0.0551167	3901	7269910	0.0536595	2344	4634062	0.050582
Proximal tubule bicarbonate reclamation	0.0449106	0.00122358	0.0436111	0.0061279	0.660075	0.660075	0.00129955	-0.0057277	0.00832679		2173	4784502	0.0454175	2817	5961362	0.0472543	2599	5830473	0.0445761	2579	5829240	0.0442425	2426	5603916	0.0432912	2239	5010959	0.0446821	2645	5749760	0.0460019	2739	5762448	0.0475319	2147	5837442	0.0367798	1672	4873296	0.0343094	3282	7269910	0.045145	2405	4634062	0.0518983
Purine metabolism	1.75175	0.0193647	1.73394	0.0337548	0.336297	0.336297	0.0178059	-0.022353	0.0579647		84619	4784502	1.76861	106033	5961362	1.77867	102021	5830473	1.74979	102433	5829240	1.75723	97212	5603916	1.73472	86262	5010959	1.72147	100230	5749760	1.7432	101594	5762448	1.76304	99359	5837442	1.7021	82239	4873296	1.68754	125240	7269910	1.72272	82720	4634062	1.78504
Pyrimidine metabolism	1.0753	0.0217999	1.02779	0.0483348	0.0853986	0.0853986	0.0475188	-0.00862951	0.103667		52844	4784502	1.10448	65561	5961362	1.09977	62057	5830473	1.06436	62946	5829240	1.07983	59416	5603916	1.06026	52271	5010959	1.04313	59850	5749760	1.04091	61609	5762448	1.06915	56885	5837442	0.974485	46969	4873296	0.963804	74081	7269910	1.01901	50945	4634062	1.09936
Pyruvate metabolism	0.962031	0.0093671	0.950932	0.0310497	0.473592	0.473592	0.0110993	-0.024533	0.0467317		46244	4784502	0.966537	56744	5961362	0.951863	56356	5830473	0.966577	55289	5829240	0.948477	54700	5603916	0.976103	48237	5010959	0.96263	54227	5749760	0.943118	53334	5762448	0.925544	57380	5837442	0.982965	48547	4873296	0.996184	69182	7269910	0.951621	41992	4634062	0.90616
Regulation of actin cytoskeleton	0	0	0	0	1	1	0	0	0	degenerate case: variance of both groups is zero	0	4784502	0	0	5961362	0	0	5830473	0	0	5829240	0	0	5603916	0	0	5010959	0	0	5749760	0	0	5762448	0	0	5837442	0	0	4873296	0	0	7269910	0	0	4634062	0
Renal cell carcinoma	0.0151482	0.000432591	0.0150349	0.00262823	0.927754	0.927754	0.00011327	-0.00290209	0.00312862		730	4784502	0.0152576	863	5961362	0.0144766	925	5830473	0.0158649	865	5829240	0.014839	861	5603916	0.0153643	756	5010959	0.0150869	812	5749760	0.0141223	757	5762448	0.0131368	997	5837442	0.0170794	957	4873296	0.0196376	1060	7269910	0.0145806	540	4634062	0.0116528
Renin-angiotensin system	0.0135516	0.00115322	0.0134204	0.00551135	0.960317	0.960317	0.000131172	-0.00618849	0.00645084		681	4784502	0.0142335	922	5961362	0.0154663	682	5830473	0.0116972	798	5829240	0.0136896	737	5603916	0.0131515	655	5010959	0.0130714	898	5749760	0.015618	982	5762448	0.0170414	502	5837442	0.00859966	200	4873296	0.004104	1050	7269910	0.0144431	960	4634062	0.0207162
Restriction enzyme	0.0535618	0.0045145	0.044689	0.00892742	0.0855443	0.0855443	0.00887278	-0.00159146	0.019337		2844	4784502	0.0594419	3550	5961362	0.0595501	2914	5830473	0.0499788	3124	5829240	0.0535919	2852	5603916	0.050893	2401	5010959	0.047915	2863	5749760	0.0497934	3102	5762448	0.0538313	2288	5837442	0.0391953	1553	4873296	0.0318675	2735	7269910	0.0376208	2587	4634062	0.0558258
Retinol metabolism	0.115307	0.00465045	0.120397	0.00881041	0.288067	0.288067	-0.00508972	-0.0154623	0.00528287		5604	4784502	0.117128	6339	5961362	0.106335	6735	5830473	0.115514	6597	5829240	0.113171	6728	5603916	0.120059	5995	5010959	0.119638	6730	5749760	0.117048	6516	5762448	0.113077	7336	5837442	0.125671	6524	4873296	0.133872	9107	7269910	0.12527	4979	4634062	0.107444
Rheumatoid arthritis	0	0	0	0	1	1	0	0	0	degenerate case: variance of both groups is zero	0	4784502	0	0	5961362	0	0	5830473	0	0	5829240	0	0	5603916	0	0	5010959	0	0	5749760	0	0	5762448	0	0	5837442	0	0	4873296	0	0	7269910	0	0	4634062	0
Riboflavin metabolism	0.261993	0.00631204	0.247092	0.025192	0.249811	0.249811	0.0149014	-0.0139834	0.0437861		12912	4784502	0.269871	16083	5961362	0.269787	14888	5830473	0.255348	15364	5829240	0.263568	14530	5603916	0.259283	12733	5010959	0.254103	14759	5749760	0.256689	15552	5762448	0.269885	13081	5837442	0.224088	10069	4873296	0.206616	17893	7269910	0.246124	12936	4634062	0.27915
Ribosome	1.40431	0.0401391	1.32373	0.0847748	0.0953955	0.0953955	0.0805829	-0.018229	0.179395		70143	4784502	1.46605	85761	5961362	1.43861	80980	5830473	1.38891	82128	5829240	1.4089	77421	5603916	1.38155	67239	5010959	1.34184	77746	5749760	1.35216	80592	5762448	1.39857	71924	5837442	1.23212	58997	4873296	1.21062	94684	7269910	1.30241	67031	4634062	1.44648
Ribosome Biogenesis	0.806171	0.0175852	0.770466	0.0314131	0.0579958	0.0579958	0.0357051	-0.00154204	0.0729522		39541	4784502	0.826439	49519	5961362	0.830666	46380	5830473	0.795476	47194	5829240	0.809608	44281	5603916	0.79018	39319	5010959	0.78466	44849	5749760	0.780015	45960	5762448	0.797578	43081	5837442	0.738012	35634	4873296	0.731209	55054	7269910	0.757286	37939	4634062	0.818699
Ribosome biogenesis in eukaryotes	0.0285175	0.000862509	0.0262899	0.00143234	0.0171318	0.0171318	0.00222758	0.000510765	0.00394439		1426	4784502	0.0298046	1754	5961362	0.0294228	1601	5830473	0.0274592	1669	5829240	0.0286315	1574	5603916	0.0280875	1388	5010959	0.0276993	1532	5749760	0.0266446	1599	5762448	0.0277486	1443	5837442	0.0247197	1176	4873296	0.0241315	1927	7269910	0.0265065	1297	4634062	0.0279884
RIG-I-like receptor signaling pathway	0.00116967	0.000328957	0.00100477	0.000278274	0.412708	0.412708	0.000164895	-0.000266052	0.000595842		28	4784502	0.000585223	77	5961362	0.00129165	57	5830473	0.000977622	75	5829240	0.00128662	93	5603916	0.00165955	61	5010959	0.00121733	48	5749760	0.000834817	49	5762448	0.000850333	63	5837442	0.00107924	67	4873296	0.00137484	95	7269910	0.00130676	27	4634062	0.000582642
RNA degradation	0.363948	0.00771762	0.346815	0.0136775	0.0410015	0.0410015	0.0171331	0.000898192	0.0333681		17798	4784502	0.371993	22244	5961362	0.373136	21119	5830473	0.362218	21388	5829240	0.366909	20080	5603916	0.358321	17594	5010959	0.35111	20239	5749760	0.351997	20580	5762448	0.35714	19264	5837442	0.330008	16194	4873296	0.332301	24798	7269910	0.341105	17069	4634062	0.368338
RNA polymerase	0.103167	0.00310034	0.097071	0.00601661	0.0812599	0.0812599	0.0060962	-0.000969231	0.0131616		5152	4784502	0.107681	6321	5961362	0.106033	5970	5830473	0.102393	6028	5829240	0.10341	5678	5603916	0.101322	4919	5010959	0.0981648	5716	5749760	0.0994128	5900	5762448	0.102387	5281	5837442	0.0904677	4346	4873296	0.0891799	6927	7269910	0.0952832	4898	4634062	0.105696
RNA transport	0.044379	0.00201168	0.0412891	0.00934319	0.49949	0.49949	0.0030899	-0.00762313	0.0138029		2132	4784502	0.0445605	2871	5961362	0.0481601	2597	5830473	0.0445418	2588	5829240	0.0443969	2325	5603916	0.0414888	2161	5010959	0.0431255	2509	5749760	0.0436366	2807	5762448	0.0487119	1839	5837442	0.0315035	1327	4873296	0.02723	3081	7269910	0.0423802	2515	4634062	0.054272
Salivary secretion	0	0	0	0	1	1	0	0	0	degenerate case: variance of both groups is zero	0	4784502	0	0	5961362	0	0	5830473	0	0	5829240	0	0	5603916	0	0	5010959	0	0	5749760	0	0	5762448	0	0	5837442	0	0	4873296	0	0	7269910	0	0	4634062	0
Secondary bile acid biosynthesis	0.000456312	0.000232162	0.000945055	0.000349309	0.0292681	0.0292681	-0.000488743	-0.00091533	-6.21553e-05		14	4784502	0.000292611	51	5961362	0.000855509	38	5830473	0.000651748	16	5829240	0.000274478	26	5603916	0.000463961	10	5010959	0.000199563	55	5749760	0.000956562	73	5762448	0.00126682	84	5837442	0.00143899	19	4873296	0.00038988	69	7269910	0.000949118	31	4634062	0.00066896
Secretion system	1.48095	0.0238034	1.49457	0.0480131	0.586908	0.586908	-0.0136174	-0.0697929	0.0425582		70436	4784502	1.47217	89726	5961362	1.50513	86690	5830473	1.48684	86455	5829240	1.48313	80383	5603916	1.43441	75366	5010959	1.50402	85997	5749760	1.49566	87790	5762448	1.52348	84372	5837442	1.44536	69156	4873296	1.41908	111077	7269910	1.5279	72102	4634062	1.55591
Selenocompound metabolism	0.390122	0.00546225	0.380902	0.0175163	0.304362	0.304362	0.00921996	-0.0108884	0.0293283		19049	4784502	0.39814	23590	5961362	0.395715	22404	5830473	0.384257	22843	5829240	0.391869	21634	5603916	0.386051	19277	5010959	0.384697	22351	5749760	0.388729	22792	5762448	0.395526	21233	5837442	0.363738	17291	4873296	0.354811	27453	7269910	0.377625	18767	4634062	0.404979
Sesquiterpenoid biosynthesis	0.000569368	0.00013918	0.000553808	0.000403684	0.937637	0.937637	1.55599e-05	-0.000448566	0.000479685		25	4784502	0.00052252	45	5961362	0.000754861	27	5830473	0.000463084	35	5829240	0.000600421	20	5603916	0.000356893	36	5010959	0.000718425	0	5749760	0	22	5762448	0.000381782	33	5837442	0.000565316	28	4873296	0.00057456	98	7269910	0.00134802	21	4634062	0.000453166
Shigellosis	0	0	0	0	1	1	0	0	0	degenerate case: variance of both groups is zero	0	4784502	0	0	5961362	0	0	5830473	0	0	5829240	0	0	5603916	0	0	5010959	0	0	5749760	0	0	5762448	0	0	5837442	0	0	4873296	0	0	7269910	0	0	4634062	0
Signal transduction mechanisms	0.376669	0.00942986	0.356141	0.0361649	0.267846	0.267846	0.0205284	-0.0209409	0.0619977		18307	4784502	0.382631	23482	5961362	0.393903	21578	5830473	0.37009	22007	5829240	0.377528	20700	5603916	0.369385	18364	5010959	0.366477	21270	5749760	0.369928	22131	5762448	0.384056	18995	5837442	0.325399	14514	4873296	0.297827	25681	7269910	0.353251	18832	4634062	0.406382
Small cell lung cancer	0.0414509	0.00236314	0.0493782	0.00644161	0.0396749	0.0396749	-0.00792723	-0.0153439	-0.000510569		1804	4784502	0.0377051	2341	5961362	0.0392695	2438	5830473	0.0418148	2466	5829240	0.042304	2389	5603916	0.0426309	2254	5010959	0.0449814	2711	5749760	0.0471498	2486	5762448	0.0431414	3240	5837442	0.0555038	2882	4873296	0.0591386	3664	7269910	0.0503995	1897	4634062	0.040936
Sphingolipid metabolism	0.118692	0.00638384	0.112829	0.0292145	0.677859	0.677859	0.00586285	-0.0276343	0.03936		5801	4784502	0.121246	7789	5961362	0.130658	7003	5830473	0.12011	6743	5829240	0.115675	6307	5603916	0.112546	5608	5010959	0.111915	7257	5749760	0.126214	7961	5762448	0.138153	5181	5837442	0.0887546	3065	4873296	0.0628938	8222	7269910	0.113096	6852	4634062	0.147862
Spliceosome	0	0	0	0	1	1	0	0	0	degenerate case: variance of both groups is zero	0	4784502	0	0	5961362	0	0	5830473	0	0	5829240	0	0	5603916	0	0	5010959	0	0	5749760	0	0	5762448	0	0	5837442	0	0	4873296	0	0	7269910	0	0	4634062	0
Sporulation	0.0273559	0.00366874	0.0252949	0.00558061	0.508266	0.508266	0.00206101	-0.0047384	0.00886042		1329	4784502	0.0277772	2041	5961362	0.0342371	1559	5830473	0.0267388	1520	5829240	0.0260754	1543	5603916	0.0275343	1091	5010959	0.0217723	1355	5749760	0.0235662	1619	5762448	0.0280957	1251	5837442	0.0214306	857	4873296	0.0175856	1870	7269910	0.0257225	1639	4634062	0.0353685
Staphylococcus aureus infection	0.00103911	0.000354187	0.000603009	0.000291291	0.0603839	0.0603839	0.000436097	-2.31789e-05	0.000895374		46	4784502	0.000961438	103	5961362	0.00172779	72	5830473	0.00123489	43	5829240	0.00073766	49	5603916	0.000874389	35	5010959	0.000698469	53	5749760	0.000921778	43	5762448	0.000746211	12	5837442	0.000205569	36	4873296	0.00073872	59	7269910	0.000811564	9	4634062	0.000194214
Starch and sucrose metabolism	0.692167	0.0197771	0.637001	0.103811	0.292363	0.292363	0.0551667	-0.0638914	0.174225		34226	4784502	0.715351	42949	5961362	0.720456	39588	5830473	0.678984	40468	5829240	0.694224	37494	5603916	0.669068	33820	5010959	0.674921	38740	5749760	0.673767	41630	5762448	0.722436	31786	5837442	0.544519	22765	4873296	0.467138	46586	7269910	0.640806	35837	4634062	0.773339
Steroid biosynthesis	0.0278188	0.00180543	0.0284166	0.00508654	0.812354	0.812354	-0.000597779	-0.0064495	0.00525395		1347	4784502	0.0281534	1879	5961362	0.0315196	1599	5830473	0.0274249	1515	5829240	0.0259897	1539	5603916	0.0274629	1321	5010959	0.0263622	1831	5749760	0.0318448	1853	5762448	0.0321565	1491	5837442	0.025542	910	4873296	0.0186732	2090	7269910	0.0287486	1554	4634062	0.0335343
Steroid hormone biosynthesis	0.0306774	0.00261192	0.0331774	0.00467144	0.327377	0.327377	-0.00249991	-0.00803803	0.00303822		1507	4784502	0.0314975	1837	5961362	0.0308151	1927	5830473	0.0330505	1532	5829240	0.0262813	1901	5603916	0.0339227	1428	5010959	0.0284975	2170	5749760	0.0377407	1859	5762448	0.0322606	2318	5837442	0.0397092	1607	4873296	0.0329756	2260	7269910	0.031087	1172	4634062	0.025291
Streptomycin biosynthesis	0.290785	0.00568589	0.285223	0.0151283	0.469099	0.469099	0.00556168	-0.0118685	0.0229918		14191	4784502	0.296603	17820	5961362	0.298925	17038	5830473	0.292223	16807	5829240	0.288322	15990	5603916	0.285336	14196	5010959	0.283299	16628	5749760	0.289195	17130	5762448	0.297269	15786	5837442	0.270427	12806	4873296	0.262779	20671	7269910	0.284336	14242	4634062	0.307333
Styrene degradation	0.179045	0.00590961	0.190101	0.0105514	0.0758122	0.0758122	-0.0110567	-0.0235685	0.00145518		8027	4784502	0.167771	10450	5961362	0.175296	10597	5830473	0.181752	10572	5829240	0.181362	10219	5603916	0.182355	9307	5010959	0.185733	10673	5749760	0.185625	10489	5762448	0.182023	11917	5837442	0.204148	9866	4873296	0.20245	13919	7269910	0.19146	8105	4634062	0.174901
Sulfur metabolism	0.351724	0.00456855	0.348257	0.0103883	0.517004	0.517004	0.00346623	-0.008583	0.0155155		17093	4784502	0.357258	21175	5961362	0.355204	20212	5830473	0.346661	20749	5829240	0.355947	19575	5603916	0.349309	17336	5010959	0.345962	20207	5749760	0.351441	20541	5762448	0.356463	19641	5837442	0.336466	16365	4873296	0.33581	25070	7269910	0.344846	16892	4634062	0.364518
Sulfur relay system	0.294782	0.00419105	0.288303	0.00842059	0.165467	0.165467	0.00647887	-0.00337673	0.0163345		14480	4784502	0.302644	17738	5961362	0.297549	17049	5830473	0.292412	17148	5829240	0.294172	16337	5603916	0.291528	14551	5010959	0.290384	16812	5749760	0.292395	17077	5762448	0.29635	16470	5837442	0.282144	13394	4873296	0.274845	20725	7269910	0.285079	13856	4634062	0.299003
Synthesis and degradation of ketone bodies	0.212352	0.00623664	0.207448	0.0163841	0.553183	0.553183	0.00490442	-0.0139799	0.0237888		10395	4784502	0.217264	12049	5961362	0.202118	12648	5830473	0.216929	12065	5829240	0.206974	12309	5603916	0.21965	10582	5010959	0.211177	11761	5749760	0.204548	11276	5762448	0.195681	12877	5837442	0.220593	11368	4873296	0.233271	15130	7269910	0.208118	8456	4634062	0.182475
Systemic lupus erythematosus	0.000227767	0.000222678	0.0004945	0.000440032	0.263712	0.263712	-0.000266733	-0.00078255	0.000249084		0	4784502	0	34	5961362	0.000570339	28	5830473	0.000480235	0	5829240	0	11	5603916	0.000196291	6	5010959	0.000119738	62	5749760	0.00107831	36	5762448	0.000624734	60	5837442	0.00102785	5	4873296	0.0001026	5	7269910	6.87766e-05	3	4634062	6.4738e-05
Taurine and hypotaurine metabolism	0.152781	0.0030326	0.150873	0.0044198	0.44674	0.44674	0.00190859	-0.00352779	0.00734497		7072	4784502	0.147811	9058	5961362	0.151945	8879	5830473	0.152286	8998	5829240	0.15436	8852	5603916	0.157961	7633	5010959	0.152326	8742	5749760	0.152041	8520	5762448	0.147854	9206	5837442	0.157706	7475	4873296	0.153387	10956	7269910	0.150703	6652	4634062	0.143546
Terpenoid backbone biosynthesis	0.477164	0.00890871	0.46487	0.00305743	0.0258738	0.0258738	0.0122936	0.00205194	0.0225352		23691	4784502	0.495161	28270	5961362	0.47422	27511	5830473	0.471849	27639	5829240	0.474144	26914	5603916	0.480271	23418	5010959	0.467336	26856	5749760	0.46708	27032	5762448	0.469106	26835	5837442	0.459705	22709	4873296	0.465989	33628	7269910	0.462564	21538	4634062	0.464776
Tetracycline biosynthesis	0.123119	0.00384731	0.118156	0.00845791	0.271368	0.271368	0.00496252	-0.00486803	0.0147931		6108	4784502	0.127662	7586	5961362	0.127253	7039	5830473	0.120728	7323	5829240	0.125625	6679	5603916	0.119185	5926	5010959	0.118261	6896	5749760	0.119935	7166	5762448	0.124357	6290	5837442	0.107753	5300	4873296	0.108756	8454	7269910	0.116288	6110	4634062	0.13185
TGF-beta signaling pathway	0	0	0	0	1	1	0	0	0	degenerate case: variance of both groups is zero	0	4784502	0	0	5961362	0	0	5830473	0	0	5829240	0	0	5603916	0	0	5010959	0	0	5749760	0	0	5762448	0	0	5837442	0	0	4873296	0	0	7269910	0	0	4634062	0
Thiamine metabolism	0.322423	0.00617745	0.312096	0.00905543	0.0650344	0.0650344	0.0103268	-0.000796516	0.0214501		15980	4784502	0.333995	19366	5961362	0.324859	18787	5830473	0.322221	18754	5829240	0.321723	17766	5603916	0.317028	15770	5010959	0.31471	18059	5749760	0.314083	18574	5762448	0.322328	17708	5837442	0.303352	14663	4873296	0.300885	22338	7269910	0.307267	15045	4634062	0.324661
Tight junction	0	0	0	0	1	1	0	0	0	degenerate case: variance of both groups is zero	0	4784502	0	0	5961362	0	0	5830473	0	0	5829240	0	0	5603916	0	0	5010959	0	0	5749760	0	0	5762448	0	0	5837442	0	0	4873296	0	0	7269910	0	0	4634062	0
Toluene degradation	0.234537	0.0043364	0.244439	0.00523879	0.00902256	0.00902256	-0.00990269	-0.0167115	-0.00309392		10891	4784502	0.227631	13815	5961362	0.231742	13641	5830473	0.23396	13675	5829240	0.234593	13343	5603916	0.238101	12086	5010959	0.241191	14021	5749760	0.243854	14074	5762448	0.244236	14623	5837442	0.250504	11867	4873296	0.243511	18169	7269910	0.249921	10872	4634062	0.234611
Toxoplasmosis	0.041431	0.00233356	0.0493759	0.00644124	0.0393225	0.0393225	-0.0079449	-0.0153587	-0.000531054		1804	4784502	0.0377051	2341	5961362	0.0392695	2438	5830473	0.0418148	2466	5829240	0.042304	2389	5603916	0.0426309	2248	5010959	0.0448617	2711	5749760	0.0471498	2486	5762448	0.0431414	3240	5837442	0.0555038	2882	4873296	0.0591386	3663	7269910	0.0503858	1897	4634062	0.040936
Transcription factors	1.46933	0.0198907	1.41083	0.0593238	0.0807031	0.0807031	0.0584966	-0.00967466	0.126668		70786	4784502	1.47949	88996	5961362	1.49288	84911	5830473	1.45633	85626	5829240	1.46891	80320	5603916	1.43328	74416	5010959	1.48507	81787	5749760	1.42244	83528	5762448	1.44952	79369	5837442	1.35965	64187	4873296	1.31712	102915	7269910	1.41563	69539	4634062	1.50061
Transcription machinery	0.800403	0.0270331	0.741433	0.0780202	0.159924	0.159924	0.0589706	-0.03074	0.148681		39422	4784502	0.823952	50306	5961362	0.843868	46348	5830473	0.794927	46257	5829240	0.793534	44084	5603916	0.786664	38057	5010959	0.759475	44615	5749760	0.775945	46333	5762448	0.804051	38662	5837442	0.662311	30450	4873296	0.624834	53279	7269910	0.73287	39324	4634062	0.848586
Transcription related proteins	0.000448864	0.000498844	0.000185458	0.000145544	0.30136	0.30136	0.000263406	-0.000308907	0.000835719		0	4784502	0	35	5961362	0.000587114	46	5830473	0.000788958	0	5829240	0	0	5603916	0	66	5010959	0.00131711	20	5749760	0.000347841	5	5762448	8.67687e-05	25	5837442	0.00042827	5	4873296	0.0001026	6	7269910	8.2532e-05	3	4634062	6.4738e-05
Translation factors	0.326676	0.00870083	0.30821	0.0205609	0.108518	0.108518	0.0184657	-0.00533353	0.0422649		16196	4784502	0.33851	20036	5961362	0.336098	18777	5830473	0.322049	19163	5829240	0.328739	17981	5603916	0.320865	15724	5010959	0.313792	18110	5749760	0.31497	18767	5762448	0.325678	16617	5837442	0.284662	13770	4873296	0.28256	21992	7269910	0.302507	15704	4634062	0.338882
Translation proteins	0.561644	0.00980824	0.543703	0.0273826	0.215041	0.215041	0.0179415	-0.013567	0.04945		27085	4784502	0.566099	34580	5961362	0.580069	32498	5830473	0.557382	32814	5829240	0.562921	30898	5603916	0.551364	27662	5010959	0.55203	31793	5749760	0.552945	32620	5762448	0.566079	30011	5837442	0.514112	24668	4873296	0.506187	39191	7269910	0.539085	27054	4634062	0.583807
Transporters	5.93215	0.191537	6.26911	0.550666	0.242374	0.242374	-0.336956	-0.970183	0.29627		268823	4784502	5.61862	346907	5961362	5.81926	356281	5830473	6.11067	346501	5829240	5.94419	330249	5603916	5.89318	311030	5010959	6.207	345921	5749760	6.01627	334147	5762448	5.7987	398578	5837442	6.82796	347943	4873296	7.13979	453887	7269910	6.24336	258978	4634062	5.58857
Tryptophan metabolism	0.832796	0.0223036	0.859005	0.0619065	0.405971	0.405971	-0.0262089	-0.0974533	0.0450354		39668	4784502	0.829094	47471	5961362	0.796311	48911	5830473	0.838886	47711	5829240	0.818477	48621	5603916	0.867625	42412	5010959	0.846385	48755	5749760	0.847948	46765	5762448	0.811547	53977	5837442	0.924669	45911	4873296	0.942093	62923	7269910	0.865527	35323	4634062	0.762247
Tuberculosis	0.189003	0.00241406	0.188048	0.00752778	0.796043	0.796043	0.000955222	-0.00768944	0.00959988		9166	4784502	0.191577	11327	5961362	0.190007	10931	5830473	0.187481	11163	5829240	0.1915	10579	5603916	0.188779	9254	5010959	0.184675	11050	5749760	0.192182	11177	5762448	0.193963	10495	5837442	0.179788	8611	4873296	0.176698	13673	7269910	0.188077	9156	4634062	0.19758
Two-component system	2.13126	0.0100166	2.1201	0.0245178	0.379044	0.379044	0.011163	-0.0171703	0.0394963		101983	4784502	2.13153	127831	5961362	2.14433	124516	5830473	2.13561	124717	5829240	2.13951	118592	5603916	2.11623	106251	5010959	2.12037	122421	5749760	2.12915	123471	5762448	2.14268	122443	5837442	2.09755	101861	4873296	2.09019	152967	7269910	2.10411	99953	4634062	2.15692
Type I diabetes mellitus	0.0443139	0.0010024	0.0466279	0.00213691	0.0639443	0.0639443	-0.00231396	-0.00480297	0.000175052		2032	4784502	0.0424705	2615	5961362	0.0438658	2587	5830473	0.0443703	2590	5829240	0.0444312	2559	5603916	0.0456645	2259	5010959	0.0450812	2655	5749760	0.0461758	2630	5762448	0.0456403	2894	5837442	0.0495765	2340	4873296	0.0480168	3458	7269910	0.0475659	1983	4634062	0.0427918
Type II diabetes mellitus	0.0319094	0.000554436	0.0321455	0.000496106	0.494345	0.494345	-0.000236108	-0.000978693	0.000506477		1517	4784502	0.0317065	1951	5961362	0.0327274	1849	5830473	0.0317127	1896	5829240	0.0325257	1776	5603916	0.0316921	1558	5010959	0.0310919	1821	5749760	0.0316709	1852	5762448	0.0321391	1857	5837442	0.0318119	1579	4873296	0.0324011	2308	7269910	0.0317473	1534	4634062	0.0331027
Tyrosine metabolism	0.542864	0.0108674	0.560993	0.0114853	0.0282513	0.0282513	-0.0181293	-0.0338915	-0.00236706		25979	4784502	0.542982	31343	5961362	0.525769	31180	5830473	0.534777	31567	5829240	0.541529	31196	5603916	0.556682	27833	5010959	0.555443	32046	5749760	0.557345	31851	5762448	0.552734	33030	5837442	0.56583	27848	4873296	0.571441	41890	7269910	0.576211	25135	4634062	0.542397
Ubiquinone and other terpenoid-quinone biosynthesis	0.269028	0.00227314	0.257432	0.00138496	8.23195e-06	8.23195e-06	0.0115955	0.00886554	0.0143255		13049	4784502	0.272735	16021	5961362	0.268747	15518	5830473	0.266153	15738	5829240	0.269984	14930	5603916	0.266421	13536	5010959	0.270128	14849	5749760	0.258254	14875	5762448	0.258137	14956	5837442	0.256208	12658	4873296	0.259742	18636	7269910	0.256344	11859	4634062	0.255909
Ubiquitin system	0.0256261	0.00189702	0.0209236	0.00775997	0.239427	0.239427	0.00470245	-0.00419477	0.0135997		1360	4784502	0.0284251	1661	5961362	0.0278628	1407	5830473	0.0241318	1478	5829240	0.0253549	1386	5603916	0.0247327	1165	5010959	0.023249	1379	5749760	0.0239836	1591	5762448	0.0276098	847	5837442	0.0145098	382	4873296	0.00783864	1522	7269910	0.0209356	1421	4634062	0.0306642
Various types of N-glycan biosynthesis	0	0	0	0	1	1	0	0	0	degenerate case: variance of both groups is zero	0	4784502	0	0	5961362	0	0	5830473	0	0	5829240	0	0	5603916	0	0	5010959	0	0	5749760	0	0	5762448	0	0	5837442	0	0	4873296	0	0	7269910	0	0	4634062	0
Vascular smooth muscle contraction	0	0	0	0	1	1	0	0	0	degenerate case: variance of both groups is zero	0	4784502	0	0	5961362	0	0	5830473	0	0	5829240	0	0	5603916	0	0	5010959	0	0	5749760	0	0	5762448	0	0	5837442	0	0	4873296	0	0	7269910	0	0	4634062	0
Vasopressin-regulated water reabsorption	0.00234269	0.000476512	0.00332876	0.000805216	0.0457568	0.0457568	-0.00098607	-0.00194852	-2.36243e-05		87	4784502	0.00181837	102	5961362	0.00171102	151	5830473	0.00258984	147	5829240	0.00252177	129	5603916	0.00230196	156	5010959	0.00311318	148	5749760	0.00257402	152	5762448	0.00263777	173	5837442	0.00296363	240	4873296	0.0049248	269	7269910	0.00370018	147	4634062	0.00317216
VEGF signaling pathway	1.99563e-05	4.46236e-05	2.29255e-06	5.12631e-06	0.418483	0.418483	1.76637e-05	-3.35761e-05	6.89035e-05		0	4784502	0	0	5961362	0	0	5830473	0	0	5829240	0	0	5603916	0	6	5010959	0.000119738	0	5749760	0	0	5762448	0	0	5837442	0	0	4873296	0	1	7269910	1.37553e-05	0	4634062	0
Vibrio cholerae infection	0.000152366	0.000220336	0.000190356	0.000118477	0.743298	0.743298	-3.799e-05	-0.00029794	0.000221959		0	4784502	0	32	5961362	0.00053679	0	5830473	0	22	5829240	0.000377408	0	5603916	0	0	5010959	0	11	5749760	0.000191312	6	5762448	0.000104122	0	5837442	0	14	4873296	0.00028728	14	7269910	0.000192575	17	4634062	0.000366849
Vibrio cholerae pathogenic cycle	0.0406991	0.0016233	0.0366215	0.00560611	0.170672	0.170672	0.00407756	-0.00235387	0.010509		1947	4784502	0.0406939	2608	5961362	0.0437484	2348	5830473	0.0402712	2417	5829240	0.0414634	2179	5603916	0.0388835	1961	5010959	0.0391342	2183	5749760	0.0379668	2358	5762448	0.0409201	1816	5837442	0.0311095	1373	4873296	0.028174	2674	7269910	0.0367817	2075	4634062	0.0447771
Viral myocarditis	0.041431	0.00233356	0.0493759	0.00644124	0.0393225	0.0393225	-0.0079449	-0.0153587	-0.000531054		1804	4784502	0.0377051	2341	5961362	0.0392695	2438	5830473	0.0418148	2466	5829240	0.042304	2389	5603916	0.0426309	2248	5010959	0.0448617	2711	5749760	0.0471498	2486	5762448	0.0431414	3240	5837442	0.0555038	2882	4873296	0.0591386	3663	7269910	0.0503858	1897	4634062	0.040936
Vitamin B6 metabolism	0.143879	0.0012748	0.141507	0.00114494	0.0114974	0.0114974	0.0023716	0.000661548	0.00408165		6939	4784502	0.145031	8619	5961362	0.144581	8473	5830473	0.145323	8368	5829240	0.143552	7934	5603916	0.14158	7176	5010959	0.143206	8123	5749760	0.141275	8162	5762448	0.141641	8322	5837442	0.142562	6901	4873296	0.141608	10376	7269910	0.142725	6452	4634062	0.13923
Wnt signaling pathway	0.000101652	0.000144835	5.79734e-05	0.000129633	0.626343	0.626343	4.36789e-05	-0.000150328	0.000237686		0	4784502	0	20	5961362	0.000335494	16	5830473	0.00027442	0	5829240	0	0	5603916	0	0	5010959	0	20	5749760	0.000347841	0	5762448	0	0	5837442	0	0	4873296	0	0	7269910	0	0	4634062	0
Xylene degradation	0.0367493	0.00248928	0.0302989	0.0014873	0.00102316	0.00102316	0.00645036	0.00347047	0.00943024		1748	4784502	0.0365346	2058	5961362	0.0345223	2213	5830473	0.0379558	1928	5829240	0.0330746	2287	5603916	0.0408107	1884	5010959	0.0375976	1746	5749760	0.0303665	1722	5762448	0.0298831	1870	5837442	0.0320346	1423	4873296	0.0292	2345	7269910	0.0322562	1300	4634062	0.0280531
Zeatin biosynthesis	0.0257481	0.000756273	0.0241791	0.00153961	0.0785352	0.0785352	0.00156898	-0.000230912	0.00336888		1286	4784502	0.0268785	1575	5961362	0.0264201	1486	5830473	0.0254868	1506	5829240	0.0258353	1419	5603916	0.0253216	1230	5010959	0.0245462	1424	5749760	0.0247663	1474	5762448	0.0255794	1320	5837442	0.0226126	1078	4873296	0.0221206	1716	7269910	0.0236041	1223	4634062	0.0263915
